1 **Title**

2 **The U1 snRNP subunit LUC7 controls plant development and stress response**  
3 **through alternative splicing regulation**

4

5 **Authors**

6 Marcella de Francisco Amorim<sup>1,2,3</sup>, Eva-Maria Willing<sup>4</sup>, Anchiie G. Francisco-  
7 Mangilet<sup>1,2,3,5</sup>, Irina Droste-Borel<sup>6</sup>, Boris Maček<sup>6</sup>, Korbinian Schneeberger<sup>4</sup> and  
8 Sascha Laubinger<sup>1,2,3,5\*</sup>

9

10 **Affiliations**

11 <sup>1</sup> Centre for Plant Molecular Biology (ZMBP), University of Tuebingen, Tuebingen,  
12 Germany

13 <sup>2</sup> Chemical Genomics Centre (CGC) of the Max Planck Society, Dortmund, Germany

14 <sup>3</sup> Max Planck Institute for Developmental Biology, Tuebingen, Germany

15 <sup>4</sup> Max Planck Institute for Plant Breeding Research (MIPZ), Cologne, Germany

16 <sup>5</sup> Carl von Ossietzky University, Oldenburg, Germany

17 <sup>6</sup> Proteome Centre, University of Tuebingen, Tuebingen, Germany

18

19 Corresponding author: Sascha Laubinger ([sascha.laubinger@uol.de](mailto:sascha.laubinger@uol.de))

20

21 Keywords: U1 snRNP, Splicing, Non-sense mediated mRNA decay (NMD),

22 Polyadenylation, RNA transport, Arabidopsis

23 **Abstract**

24

25 Introns are removed by the spliceosome, a large macromolecular complex composed  
26 of five ribonucleoprotein subcomplexes (U snRNP). The U1 snRNP, which binds to 5'  
27 splice sites, plays an essential role in early steps of the splicing reaction. Here, we  
28 show that Arabidopsis LUC7 proteins, which are encoded by a three-member gene  
29 family in Arabidopsis, are important for plant development and stress resistance. We  
30 show that LUC7 are U1 snRNP accessory proteins by RNA immunoprecipitation  
31 experiments and LUC7 protein complex purifications. Transcriptome analyses  
32 revealed that LUC7 proteins are not only important for constitutive splicing, but also  
33 affects hundreds of alternative splicing events. Interestingly, LUC7 proteins  
34 specifically promote splicing of a subset of terminal introns. Splicing of LUC7-  
35 dependent introns is a prerequisite for nuclear export and some splicing events are  
36 modulated by stress in a LUC7-dependent manner. Taken together our results  
37 highlight the importance of the U1 snRNP component LUC7 in splicing regulation and  
38 suggest a previously unrecognized role of a U1 snRNP accessory factor in terminal  
39 intron splicing.

40

## 41 **Introduction**

42 Eukaryotic genes are often interrupted by non-coding sequences called introns that  
43 are removed from pre-mRNAs while the remaining sequence, the exons, are joined  
44 together. This process, called splicing, is an essential step before the translation of  
45 the mature mRNAs and it offers a wide range of advantages for eukaryotic  
46 organisms. For instance, alternative splicing allows the production of more than one  
47 isoform from a single gene expanding the genome coding capacity (Kornblihtt et al.,  
48 2013; Reddy et al., 2013). Alternative splicing can also regulate gene expression by  
49 generating transcripts with premature termination codons (PTC) or/and a long 3'UTR,  
50 which may lead to RNA degradation via the nonsense-mediated decay (NMD)  
51 pathway (Kalyna et al., 2012; Drechsel et al., 2013; Shaul, 2015). Furthermore,  
52 splicing is usually coupled with other RNA processing events, such as 3'end  
53 formation and RNA transport to the cytosol (Kaida, 2016; Muller-McNicoll et al.,  
54 2016). In plants, alternative splicing contributes to essentially all aspects of  
55 development and stress responses (Carvalho et al., 2013; Staiger and Brown, 2013).

56 Intron removal is catalyzed by a large macromolecular complex, the  
57 spliceosome, which is formed by five small ribonucleoprotein particles (U snRNP):  
58 the U1, U2, U4, U5 and U6 snRNP. Each U snRNP contains a heteroheptameric ring  
59 of Sm or Lsm proteins, snRNP-specific proteins and an uridine-rich snRNA.  
60 Additional non-core spliceosomal proteins participate during the splicing reaction  
61 affecting exon-intron recognition and thus splicing efficiency. The canonical splicing  
62 cycle starts with binding of the U1 snRNP to the 5' splice site (5'ss), followed by  
63 association of auxiliary proteins such as U2AF to the pre-mRNA, which facilitate the  
64 recognition of the 3' splice site (3'ss). The thereby formed complex E recruits the U2  
65 snRNP to generate complex A. In the next step, a trimeric complex consisting of  
66 U4/U5/U6 snRNPs joins to form complex B. Several rearrangements and ejection of

67 the U1 and U4 snRNP are necessary to generate a catalytically active splicing  
68 complex (Wahl et al., 2009; Will and Luhrmann, 2011).

69 The fact that U1 snRNP is recruited to the 5'ss in the initial step of splicing  
70 suggests that this complex is necessary for the correct 5' splicing site selection.  
71 Indeed, it has been shown that U1-deficient zebrafish mutants accumulate alternative  
72 spliced transcripts, suggesting that the U1 snRNP indeed fulfills regulatory roles in  
73 splice site selection (Rosel et al., 2011). Although the spliceosome consists of  
74 stoichiometrically equal amounts of each subunit, the U1 snRNP is more abundant  
75 than all the other spliceosomal subcomplexes (Kaida et al., 2010; Kaida, 2016). One  
76 reason for this is that the U1 snRNP executes splicing independent functions. The  
77 metazoan U1 snRNP, for instance, binds not only to the 5'ss, but also throughout the  
78 nascent transcript blocking a premature cleavage and polyadenylation (Kaida et al.,  
79 2010; Berg et al., 2012). Furthermore, the U1 snRNP is important to regulate  
80 promoter directionality and transcription in animals (Almada et al., 2013; Guiro and  
81 O'Reilly, 2015).

82 U1 snRNP complexes were purified and characterized in yeast and human.  
83 The U1 snRNP contains the U1 snRNA, Sm proteins, three U1 core proteins (U1-  
84 70K, U1-A and U1-C) and U1-specific accessory proteins, such as LUC7, PRP39  
85 and PRP40. All these proteins are conserved in plants suggesting a U1 snRNP  
86 composition very similar to the one in yeast and metazoans (Wang and Brendel,  
87 2004; Koncz et al., 2012; Reddy et al., 2013). Interaction studies revealed that U1  
88 snRNP associates with serine-arginine (SR) proteins, indicating a complex  
89 mechanism for splicing site selection that involves also non-snRNP proteins  
90 (Golovkin and Reddy, 1998; Cho et al., 2011).

91 The function of the plant U1 snRNP is not well characterized. This might be  
92 due to the fact that in *Arabidopsis thaliana* the core U1 snRNP components *U1-70K*



93 or *U1C* are single copy genes and a complete knockout most likely causes severe  
94 mutant phenotypes or lethality. On the other hand, proteins such as PRP39, PRP40  
95 and LUC7 are encoded by small gene families, which require the generation of  
96 multiple mutants for functional studies. Some U1 specific Arabidopsis mutants have  
97 been characterized: Mutations in the accessory factor PRP39A cause delayed  
98 flowering due to increased expression of the flowering time regulator *FLOWERING*  
99 *LOCUS C (FLC)*, but the mutants do not exhibit severe developmental defects (Wang  
100 et al., 2007; Kanno et al., 2017). In a reverse genetic approach, *U1-70K* expression  
101 was specifically reduced in flowers by an antisense RNA and the resulting transgenic  
102 plants exhibit strong floral defects (Golovkin and Reddy, 2003). Moreover, a mutation  
103 in U1A causes an altered salt stress response (Gu et al., 2017). Thus, despite  
104 evidences that U1 snRNP is essential for plant development and stress response,  
105 the functions of the U1 snRNP in regulating the transcriptome of plants are largely  
106 unknown. Other characterized factors, such as GEMIN2 or SRD2 are required for the  
107 functionality of all snRNPs, but not specifically for U1 function (Ohtani and Sugiyama,  
108 2005; Schlaen et al., 2015).

109 Here, we report on the functional characterization of *Arabidopsis* mutants  
110 impaired in U1 snRNP function. For this, we focused in this study on the U1 snRNP  
111 components LUC7, which we show to be essential for normal plant development and  
112 plant stress resistance. Our whole transcriptome analyses on *luc7* triple mutant show  
113 that impairments of LUC7 proteins affect constitutive and alternative splicing.  
114 Surprisingly, our results reveal the existence of transcripts, in which terminal introns  
115 are preferentially retained in a LUC7-dependent manner. Unspliced LUC7-dependent  
116 introns cause a nuclear retention of the pre-mRNAs and the splicing efficiency of  
117 LUC7-dependent introns can be modulated by stress. Our results suggests that the  
118 plant U1 snRNP components LUC7 regulate alternative splicing of pre-mRNAs and

119 thereby impact their nuclear export, which could be a mechanism to fine-tune gene  
120 expression under stress conditions.

121 **Results**

122 **LUC7 proteins, a family of conserved nuclear zinc-finger / arginine-serine (RS)**  
123 **proteins, redundantly control plant development**

124 *LETHAL UNLESS CBC 7 (LUC7)* was first identified in a screen for synthetic lethality  
125 in a yeast strain lacking the nuclear cap-binding complex (CBC), which is involved in  
126 several RNA processing events (Fortes et al., 1999a; Gonatopoulos-Pournatzis and  
127 Cowling, 2014; Sullivan and Howard, 2016). LUC7 proteins carry a C<sub>3</sub>H and a C<sub>2</sub>H<sub>2</sub>-  
128 type zinc-fingers, which are located in the conserved LUC7 domain. LUC7 proteins  
129 from higher eukaryotes usually contain also an additional C-terminal Arginine/Serine-  
130 rich (RS) domain, which is known to mediate protein-protein interactions (Puig et al.,  
131 2007; Webby et al., 2009; Heim et al., 2014). *Arabidopsis thaliana* encodes three  
132 *LUC7* genes (*AthLUC7A*, *AthLUC7B* and *AthLUC7RL*), which are separated in two  
133 clades: *LUC7A/B* and *LUC7RL* (Figure 1A and S1). *AthLUC7RL* is more similar to its  
134 yeast homolog and lacks a conserved stretch of 80 amino acids of unknown function  
135 present in *AthLUC7A* and *AthLUC7B* (Figure S1). A phylogenetic analysis revealed  
136 that algae contain a single *LUC7* gene belonging to the *LUC7RL* clade reinforcing the  
137 idea that *LUC7RL* proteins are closer to the ancestral *LUC7* than *LUC7A/B*. In the  
138 moss *Physcomitrella* and in the fern *Selaginella* one can find proteins belonging to  
139 both clades, suggesting that the split into *LUC7RL* and *LUC7A/B* occurred early  
140 during the evolution of land plants.

141 In order to understand the function of the *Arabidopsis* U1 snRNP, we analyzed  
142 T-DNA insertion lines affecting *LUC7* genes (Figure 1B). Single and double *luc7*  
143 mutants were indistinguishable from wild-type plants (WT) (Figure S2). However,  
144 *luc7* triple mutant exhibit a wide range of developmental defects, including dwarfism  
145 and reduced apical dominance (Figure 1C-E). To test whether the impairment of  
146 *LUC7* functions was indeed responsible for the observed phenotypes, we

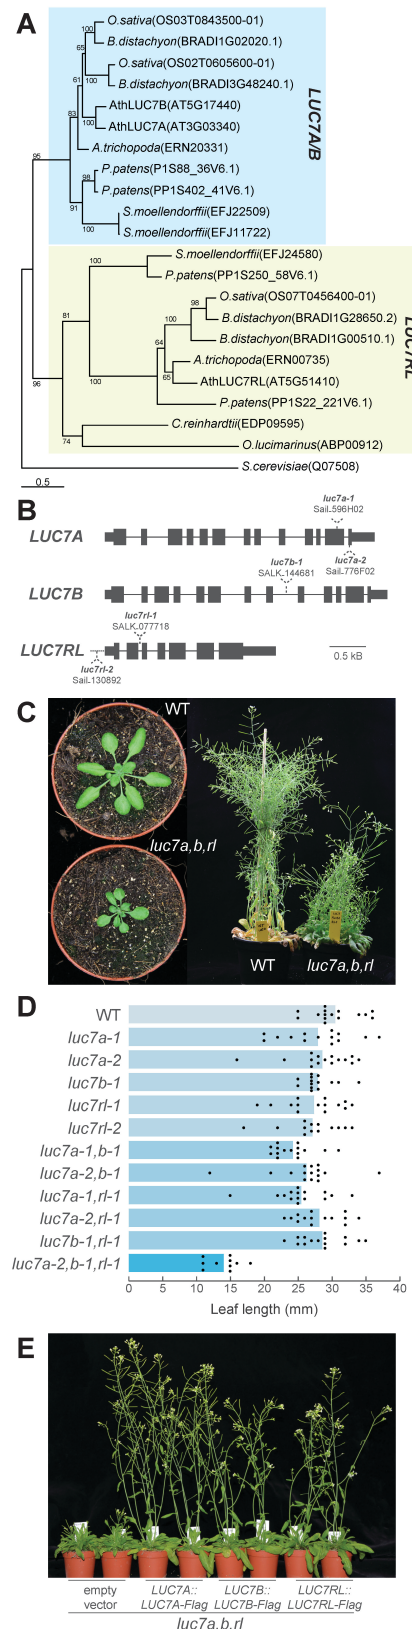

**Figure 1: Arabidopsis LUC7 proteins redundantly control plant development**  
**A:** Phylogenetic analysis of LUC7 proteins in the plant kingdom using *Saccharomyces cerevisiae* as an external group.  
**B:** Exon/intron structure of *Arabidopsis thaliana* LUC7A, LUC7B and LUC7RL. Dotted lines indicate the positions of T-DNA insertions.  
**C:** WT and *luc7* triple mutant plants 21 days (left) and 45 days (right) after germination.  
**D:** Length of the longest rosette leaf of 21 days-old WT, *luc7* single, double and triple mutant plants growing under long day conditions. Leaves of 10-15 individual plants were measured. Dots indicate individual data points.  
**E:** Complementation of *luc7a,b,rl* mutants by LUC7A, LUC7B and LUC7RL genomic rescue constructs. Transformation of an “empty” binary vector served as a control. Two independent transgenic lines for each construct are shown.

147

148 reintroduced a wild-type copy of LUC7A, LUC7B or LUC7RL in the *luc7* triple mutant.

149 Each of the LUC7 genes was sufficient to restore the growth phenotype of the *luc7*

150 triple mutant (Figure 1E). These results reveal that the phenotype observed in this  
151 mutant is attributable to the impairment of *LUC7* function and it suggests that *LUC7*  
152 genes act redundantly to control *Arabidopsis* growth and development.

153

154 **LUC7 functions in the ABA pathway and is important for cold and salt stress**  
155 **responses**

156 Splicing is essential for plant stress resistance and mutants impaired in splicing often  
157 react differently to stress and the stress hormone abscisic acid (ABA) (Filichkin et al.,  
158 2015; Zhan et al., 2015). In addition, global impairment of the splicing machinery  
159 elicits ABA signaling (AlShareef et al., 2017; Ling et al., 2017). To test whether LUC7  
160 is important for plant stress resistance and ABA-mediated stress signaling, we  
161 analyzed growth parameters of WT, the *luc7* triple mutant and a *luc7* rescue line in  
162 presence of exogenous ABA or salt. A cotyledon greening assay showed that *luc7*  
163 triple mutants reacted hypersensitively to exogenous ABA (Figure 2A, B), suggesting  
164 that *LUC7* plays an important role in the ABA pathway. Furthermore, salt in the  
165 growth medium impaired root growth much more strongly in *luc7* triple mutant than in  
166 WT or in a *luc7* rescue line (Figure 2C, D). Similarly, cold temperatures strongly  
167 compromised the growth of *luc7* triple mutants when compared to WT (Figure 2E).  
168 These results imply that functional *LUC7* proteins are required for plant stress  
169 resistance and ABA responses.

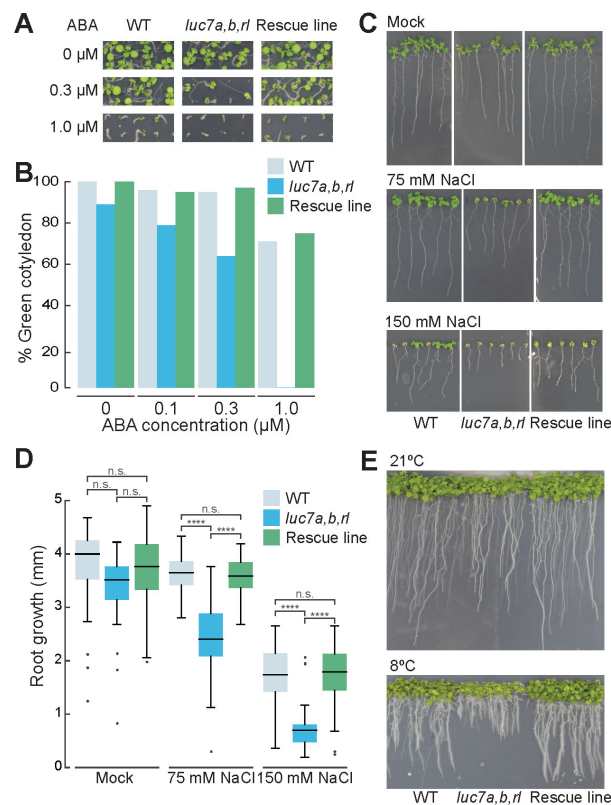

**FIGURE 2**

**Figure 2: Arabidopsis LUC7 is involved in ABA signaling and salt stress responses**

**A,B:** WT, *luc7* triple mutant and a *luc7* rescue line (*luc7a,b,rl*; *pLUC7A:LUC7A-YFP*) were grown on half-strength MS plates containing 1% sucrose and indicated amount of ABA. Seedling phenotypes (A) and quantification of seedlings with green cotyledons (B) are shown. Green cotyledons were scored ten days after germination. One of two biological replicates is shown.

**C,D:** WT, *luc7* triple mutant and a *luc7* rescue line (*luc7a,b,rl*; *pLUC7A:LUC7A-YFP*) were germinated on half-strength MS vertical plates and seedling were transferred on half-strength MS plates containing the indicated amount of NaCl. Plates were always placed vertically and the root growth was scored over 7 days. Phenotypes (C) and root length quantification (D) are shown.

**E:** Gross phenotype of WT, *luc7* triple mutant and a *luc7* rescue line grown at 22°C and 8°C.

170

171

172 **LUC7 is a U1 snRNP component in plants**

173 The composition of the U1 snRNP subcomplex is known in yeast and metazoans but  
 174 not in plants (Will and Luhrmann, 2001; Koncz et al., 2012). Therefore, we asked  
 175 whether LUC7 is also an U1 component in Arabidopsis. Due to the fact that our  
 176 genetic analyses of *luc7* mutants suggested that LUC7 proteins act largely  
 177 redundant, we focused our further analyses mainly on a single LUC7 protein, LUC7A.

178 A protein that is part of the U1 complex is tightly associated with U1 specific  
179 components such as the U1 snRNA. To test whether LUC7 is found in a complex  
180 with the U1 snRNA, we performed RNA immunoprecipitation (RIP) experiments using  
181 a *luc7* triple mutant carrying *pLUC7A:LUC7A-YFP* rescue construct (Figure S3).  
182 Immunoprecipitation of LUC7A-YFP enriched the U1 snRNA more than 40-fold, but  
183 did not enrich two unrelated, but abundant RNAs, U3 snoRNA and *ACTIN* mRNA  
184 (Figure 3A). Small amounts of U2 snRNA was also found associated with LUC7A,  
185 which is in agreement with the fact that U1 and U2 snRNP directly interact to form  
186 spliceosomal complex A (Figure 3A). However, the amount of recovered U2 snRNA  
187 is more than four-fold lower than that of the U1 snRNA (Figure 3A). These results  
188 strongly suggest that Arabidopsis LUC7 proteins are bona fide U1 snRNP  
189 components.

190 Next we analyzed the subcellular localization of LUC7A and its co-localization  
191 with a core U1 snRNP subunit. LUC7A localized to the nucleus, but not to the  
192 nucleolus in *Arabidopsis* plants containing the *pLUC7A:LUC7A-YFP* rescue construct  
193 (Figure 3B). In addition, LUC7A partially co-localized with U1-70K in the nucleoplasm  
194 when transiently expressed in *Nicotiana benthamiana* (Figure 3C). Similar results  
195 were obtained for LUC7RL, the Arabidopsis LUC7 most distant in sequence to  
196 LUC7A (Figure 3C). In plants, co-localizations studies in protoplasts have shown that  
197 also the core U1 components only partially colocalize (Lorkovic and Barta, 2008).  
198 These partial colocalizations suggest that plant U1 snRNP proteins may fulfill  
199 additional functions as it has been observed in other eukaryotes (Workman et al.,  
200 2014).



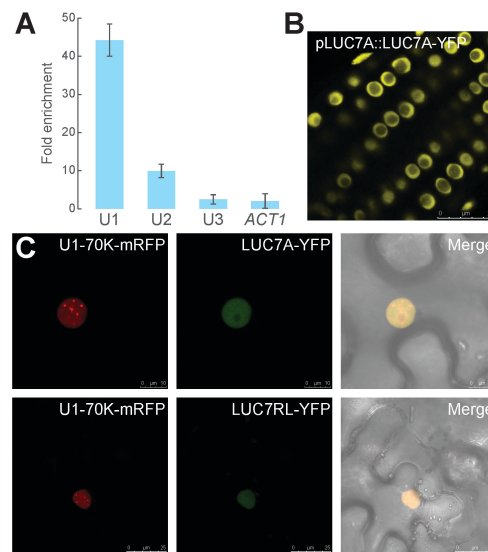

**FIGURE 3**

**Figure 3: Arabidopsis LUC7 is an U1 snRNP component**

**A:** RNA immunoprecipitation using a *pLUC7A:LUC7A-YFP, luc7a,b,rl* complemented line. Proteins were immunoprecipitated using GFP-specific affinity matrix and RNAs were extracted from the input and the immunoprecipitated fraction. U1, U2, U3 snRNAs and *ACT1N* RNA were quantified using qRT-PCR. Enrichment of the respective RNA in *LUC7A:LUC7A-YFP luc7a,b,rl* transgenic line was calculated over WT (negative control). Error bars denote the range of two biological replicates.

**B:** Subcellular localization of LUC7A in *pLUC7A:LUC7A-YFP luc7a,b,rl* in Arabidopsis transgenic plants. Roots of 9 day-old seedlings were analyzed using confocal microscopy. Scale bar indicates 25  $\mu$ m.

**C:** U1-70K-mRFP and LUC7A-YFP or LUC7RL-YFP proteins were transiently expressed in *N. benthamiana*. The subcellular localization of mRFP and YFP fusion proteins was analyzed using confocal microscopy. Scale bars indicate 10  $\mu$ m and 25  $\mu$ m for upper and lower panel, respectively.

201

202

203

204

205

206

207

208

209

210

211

To further test whether LUC7A associates in planta with known U1 snRNP components, we purified LUC7A-containing complexes. For this, we used *pLUC7A:LUC7A-YFP* complemented lines and as controls wild-type plants and transgenic lines expressing free GFP (*p35S:GFP*). Immunopurifications (IPs) were carried out three to four times independently. We observed that WT often produced more background in mass spectrometry (MS) analyses than the 35S:GFP line and we therefore decided to use WT as a more stringent control (Table S1). Among all identified proteins we considered those putative LUC7 interactors that were found in at least two independent experiments and were at least three times more abundant in *pLUC7A:LUC7A-YFP* IPs than in WT IPs. The mass spectrometry (MS) analysis



212 revealed that LUC7 is indeed found in a complex with core U1 snRNP proteins U1A  
 213 and U1-70K (Table 1, Table S1). Moreover, we detected peptides corresponding to  
 214 the spliceosomal complex E components U2AF35 and U2AF65, further suggesting  
 215 that LUC7 proteins are involved in very early steps of the splicing cycle (Table 1,  
 216 Table S1). Additional proteins known to be involved in splicing and general RNA  
 217 metabolism including several serine-arginine (SR) proteins (SR30, SCL30A, SCL33),  
 218 SR45, SERRATE (SE) and the CBC component ABH1/CBP80 were found in LUC7A-  
 219 containing complexes (Table 1, Table S1). To test the validity of the LUC7 complex  
 220 purification experiment, we confirmed the interaction between LUC7 with SE and  
 221 ABH1/CBP80 by in planta co-immunoprecipitation experiment (Figure S4).  
 222 Interestingly, we also identified regulatory proteins in LUC7A-containing complexes,  
 223 among them several kinases and proteins involved in 3'end processing (Table 1,  
 224 Table S1).

**Table 1: List of selected potential LUC7A interacting proteins identified in immunoprecipitation experiments followed by MS analysis.**

| Identified protein                                       | Aver. # of Peptides |       | Seq. Coverage (%) |       | MW (kDa) |
|----------------------------------------------------------|---------------------|-------|-------------------|-------|----------|
|                                                          | IP LUC7             | IP WT | IP LUC7           | IP WT |          |
| <b>U1 snRNP components</b>                               |                     |       |                   |       |          |
| LUC7A                                                    | 45.8                | 0     | 71.9              | 0     | 47.4     |
| U1-70K                                                   | 5                   | 0     | 13.3              | 0     | 50.4     |
| SmB-a ; SmB-b                                            | 2.5                 | 0     | 9.8               | 0     | 27.0     |
| U1A                                                      | 2                   | 0     | 7.7               | 0     | 28.1     |
| <b>Splicing-related</b>                                  |                     |       |                   |       |          |
| U2AF35A;U2AF35B                                          | 3.5                 | 1     | 11.9              | 4.3   | 34.6     |
| SCL30A;SCL33                                             | 2.8                 | 0     | 12.3              | 0     | 20.2     |
| SR45                                                     | 1.8                 | 0     | 5.2               | 0     | 44.6     |
| RSZ21;RSZ22;RSZ22A                                       | 1.8                 | 0     | 8.0               | 0     | 22.5     |
| SR30                                                     | 1                   | 0     | 3.9               | 0     | 29.1     |
| RSZ233                                                   | 1                   | 0     | 2.9               | 0     | 32.9     |
| SCL30                                                    | 0.8                 | 0     | 2.8               | 0     | 29.6     |
| U2AF65A                                                  | 0.8                 | 0     | 1.7               | 0     | 60.7     |
| <b>Kinases</b>                                           |                     |       |                   |       |          |
| SRPK4                                                    | 8.5                 | 0     | 16.2              | 0     | 59.4     |
| SRPK3                                                    | 4.3                 | 0     | 8.9               | 0     | 61.2     |
| <b>Proteins linked to 3'end processing/polyA binding</b> |                     |       |                   |       |          |
| SPT6L (AT1g63210, AT1g65440)                             | 8.5                 | 1     | 4.8               | 0.9   | 185.0    |
| Polyadenylate-binding protein RBP47C                     | 1.5                 | 0.3   | 4.0               | 0.7   | 48.6     |
| La-related protein 6B (LARP6)                            | 2.3                 | 0.7   | 5.5               | 1.9   | 60.6     |

225

226

227

228 ***LUC7* effects on the *Arabidopsis* coding and non-coding transcriptome**

229 In order to identify misregulated and misspliced genes in *luc7* mutants, we performed  
230 an RNA-sequencing (RNA-seq) analysis with three biological replicates. We decided  
231 to use seven days old WT and *luc7* triple mutant seedlings. At this age, *luc7* triple  
232 mutant and WT seedlings are morphologically similar and therefore, changes in  
233 transcript levels and splicing patterns most likely reflect changes caused by  
234 impairments of LUC7 proteins and are not due to different contribution of tissues  
235 caused by, for instance, a delay in development or/and different morphology (Figure  
236 S5). We sequenced between 22.1 and 27.6 million reads per library.

237 An analysis of differentially expressed genes revealed that 840 genes are up-  
238 and 703 are downregulated in *luc7* triple mutant when compared to WT (Table S2,  
239 Table S3). The majority of genes that change expression were protein-coding genes  
240 (Figure 4A). Nevertheless, non-coding RNAs (ncRNAs) were significantly enriched  
241 among the *LUC7* affected genes ( $p < 0.05$ , hypergeometric test), although the overall  
242 number of ncRNA affected in *luc7* triple mutant is relatively small (Figure 4A, B).  
243 Previous studies implied that the U1 snRNP regulates microRNA (miRNA)  
244 biogenesis (Bielewicz et al., 2013; Schwab et al., 2013; Knop et al., 2016; Stepien et  
245 al., 2017). However, the expression of *MIRNA* genes was not affected in *luc7* triple  
246 mutants (Figure 4A). In addition, quantification of mature miRNA levels revealed that  
247 all tested miRNAs did not change abundance in *luc7* triple mutants (Figure 4C).  
248 These results show that LUC7 proteins affect the expression of protein-coding genes  
249 and a subset of ncRNAs, but are not involved in the miRNA pathway.

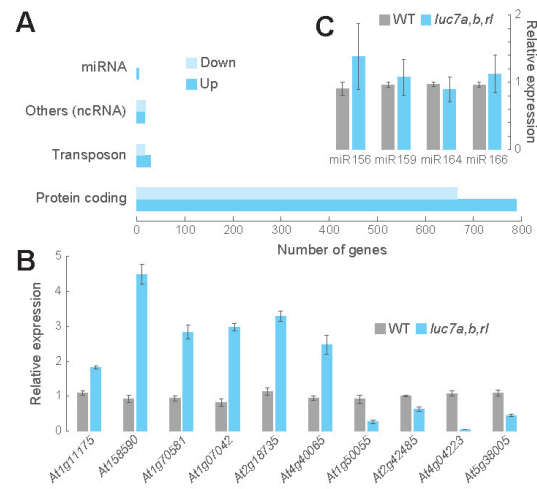

**FIGURE 4**

**Figure 4: Mutations in *LUC7* result in misexpression of protein-coding and non-coding genes, but not in *MIRNA* genes**

**A:** Differentially expressed genes in *luc7a,b,r1* mutant compared to WT.

**B,C:** qRT-PCR analysis of selected ncRNA (B) and miRNAs (C) in WT and *luc7a,b,r1*. Error bars denote the SEM (n=3).

250

251 **Arabidopsis *LUC7* functions are important for constitutive and alternative**

252 **splicing**

253 Because *LUC7* proteins are U1 snRNP components, we ask whether misspliced

254 transcripts accumulate in the *luc7* triple mutant. In total, we identified 640 differential

255 splicing events in *luc7* triple mutants compared to WT (Table S4). Only 17 of these

256 alternative splicing events occurred in mRNAs whose expression also differed

257 between *luc7* mutants and WT (Table S5, Table S6). Hence, the splicing differences

258 found were mainly not due to changes in transcript abundance. We detected a large

259 number of intron retention events in the *luc7* triple mutant (Figure 5A). RT-PCR

260 experiments with oligonucleotides flanking selected intron retentions events

261 confirmed the RNA-seq data (Figure 5B). These results suggest that lack and/or

262 impairment of the U1 snRNP component *LUC7* disturbs intron recognition and thus

263 splicing. We also identified a large number of exons skipping events in the *luc7* triple

264 mutant. Exon skipping is also a major outcome of impairing U1 snRNP function or

265 binding in metazoans (Lorkovic and Barta, 2008; Rosel et al., 2011). These defects

266 are most likely caused by interactions of the U2 snRNP with U1 snRNPs associated  
267 to alternative 5' splice sites (Morcos, 2007). Furthermore, we detected several cases  
268 of alternative 5' and 3' splice site selection in *luc7* triple mutants (Figure 5A-F).

269 Some splicing defects observed in *luc7* triple mutants generated transcript  
270 variants that did not exist in WT (e.g. *At2g32700*, Figure 5C). In these cases, LUC7  
271 proteins affect the splicing of an intron which is constitutively removed in WT plants.  
272 On the contrary, in other cases the *luc7* triple mutant lacked specific mRNA isoforms,  
273 which exist in wild-type plants (e.g. *At1g10980*, *At4g32060*), or the ratio of two  
274 different isoforms was altered in *luc7* triple mutant when compared to WT (e.g.  
275 *At3g17310*, *At5g16715*, *At5g48150*, *At2g11000*) (Figure 5D-F). In these cases, LUC7  
276 proteins affect a splicing event which is subjected to alternative splicing in WT plants.  
277 These results show that LUC7 proteins are involved in both constitutive and  
278 alternative splicing in Arabidopsis.

279 Next, we checked whether splicing changes observed in *luc7* triple mutant are  
280 actually due to the loss of only a specific *LUC7* gene or whether *LUC7* genes act  
281 redundantly. To test this, we analyzed the splicing pattern of some mRNAs in *luc7*  
282 single, double and triple mutants. Some splicing defects were detectable even in *luc7*  
283 single mutants (Figure S6), but the degree of missplicing increased in *luc7* double  
284 and triple mutants suggesting that LUC7 proteins act additively on these introns (e.g.  
285 *At5g16715*). Some splicing defects occurred only in *luc7* triple mutants, implying that  
286 LUC7 proteins act redundantly to ensure splicing of these introns (e.g. *At1g60995*).  
287 Other splicing defects might more likely be due to the lack of LUC7A/B or LUC7RL.  
288 For instance, intron removal of *At2g42010* more strongly relied on *LUC7RL*, while  
289 removal of an intron in *At5g41220* preferentially depends on LUC7A/LUC7B (Figure  
290 S6). These findings suggest that Arabidopsis *LUC7* genes function redundantly,  
291 additively or specifically to ensure proper splicing.

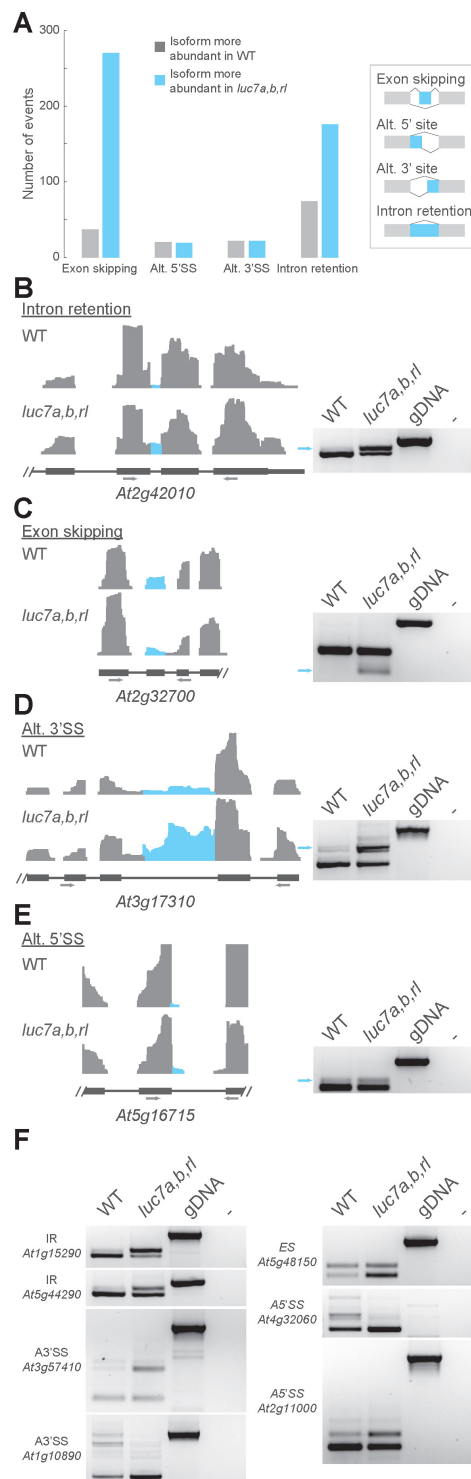

**Figure 5: Global analysis of splicing defects in *luc7* triple mutant.**

**A:** Classification of splicing events changes in *luc7* triple mutant compared to WT.

**B-F:** Coverage plots and RT-PCR validation experiments for selected splicing events in WT and *luc7* triple mutant. Genomic DNA (gDNA) or water (-) served as a control. Primer positions are indicated with gray arrows. IR, intron retention; ES, exon skipping; Alt.3'SS, alternative 3'splicing site; Alt.5'SS, alternative 5'splicing site.

292

293

294 **LUC7 proteins are preferentially involved in the removal of terminal introns**

295 In yeast, LUC7 connects the CBC with the U1 snRNP and this interaction is

296 important for the correct 5' splicing site selection (Fortes et al., 1999b). In plants, the

297 CBC associates with SE to ensure splicing of cap-proximal first introns (Laubinger et  
298 al., 2008; Raczynska et al., 2010; Raczynska et al., 2013). In addition, we show here  
299 that LUC7A form complexes with SE and ABH1/CBP80, one of the CBC competent  
300 (Table S1, Figure S4). To investigate the relationship between LUC7 and the  
301 CBC/SE in plants, we analyzed the splicing patterns of LUC7 dependent introns in  
302 *cbc* mutants (*cbp20* and *cbp80*) and *se-1* by RT-PCR. All tested introns retained in  
303 *luc7* triple mutant were correctly spliced in *cbc* and *se* mutants (Figure 6A).  
304 Conversely, first introns that were partially retained in *cbp20*, *cbp80* and *se-1*  
305 mutants were completely removed in the *luc7* triple mutant (Figure 6B). These  
306 observations suggest that the functions of LUC7 and CBC/SE in splicing of the  
307 selected introns do not overlap.

308         Next, we asked whether LUC7 has a preference for promoting splicing of cap-  
309 proximal first introns as it has the CBC/SE complex. We classified retained introns in  
310 *luc7* triple mutant according to their position within the gene (first, middle or last  
311 introns). Only genes with at least 3 introns were considered for this analysis. We  
312 found a significant increase in retained last introns, but not first introns, in *luc7* triple  
313 mutants (Figure 6C). Although the total number of retained introns was higher among  
314 middle introns, the relative amount of retained middle introns in *luc7* triple mutant  
315 was significantly reduced (Figure 6C). Retention of terminal introns in *luc7* triple  
316 mutants was confirmed by RT-PCR analysis (Figure 6D). In summary, our data  
317 revealed that (i) CBC/SE acts independently of LUC7 in splicing of cap-proximal  
318 introns and that (ii) LUC7 proteins play an important role for the removal of certain  
319 terminal introns.

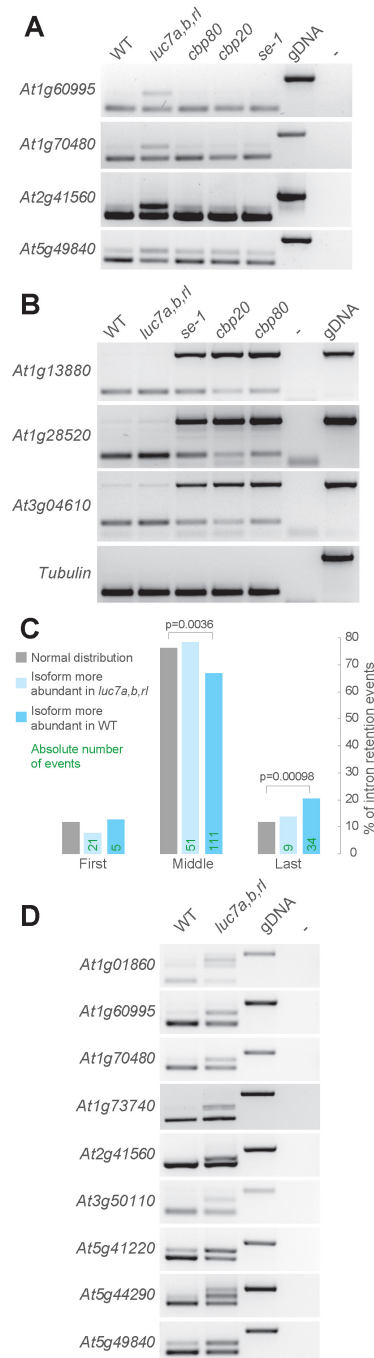

## FIGURE 6

### Figure 6: LUC7 proteins have a pronounced effect on terminal intron splicing

**A:** RT-PCR analysis of LUC7-dependent introns in WT, *luc7* triple mutant, *cbp80*, *cbp20* and *se-1* mutants.

**B:** RT-PCR analysis of CBC/SE-dependent introns in WT, *luc7* triple mutant, *cbp80*, *cbp20* and *se-1* mutants.

**C:** Classification of intron retention according to the intron position (first, middle, or last). Only genes with 3 or more introns were considered for this analysis.

**D:** RT-PCR analysis of genes carrying retained terminal introns in WT and *luc7* triple mutants.

320

321



322 **mRNAs harboring unspliced LUC7-dependent introns remain in the nucleus**  
323 **and escape NMD**

324 We were further interested in determining the characteristics and possible functions  
325 of LUC7-dependent introns. When introns are retained, the resulting mRNA can  
326 contain a premature stop codon and a long 3'UTR, which are hallmarks of NMD  
327 targets (Kalyna et al., 2012; Drechsel et al., 2013; Shaul, 2015). To check whether  
328 mRNAs containing a retained LUC7-dependent introns are NMD substrates, we  
329 analyzed their splicing patterns in two mutants impaired in NMD, *lba-1* and *upf3-1*. If  
330 unspliced isoforms were indeed NMD targets, we would expect their abundance to  
331 be increased in NMD mutants. Interestingly, we did not observe any change between  
332 WT and *upf* mutants (Figure 7A). Thus, we conclude that the tested LUC7-dependent  
333 introns do not trigger degradation via the NMD pathway.

334 NMD occurs in the cytoplasm and RNAs can escape NMD by not being  
335 transported from the nucleus to the cytosol (Gohring et al., 2014). We therefore  
336 checked in which cellular compartment mRNAs with spliced and unspliced LUC7-  
337 dependent introns accumulate. To do this, we isolated total, nuclear and cytosolic  
338 fractions from wild-type and *luc7* triple mutant plants and performed RT-PCR  
339 analyses (Figure 7B). Purity of cytosolic and nuclear fractions was controlled by  
340 immunoblot analysis using antibodies against histone H3 (specific for nuclear  
341 fractions) and a 60S ribosomal protein (L13-1, specific for cytosolic fractions) (Figure  
342 7C). Spliced mRNA isoforms accumulated in the cytosol, whereas mRNAs containing  
343 the unspliced LUC7-dependent introns were found in nuclear fractions (Figure 7B).  
344 These results indicate that retention of LUC7-dependent introns correlates with  
345 trapping mRNAs in the nucleus and suggest that splicing of LUC7-dependent introns  
346 is essential for mRNA transport to the cytosol.



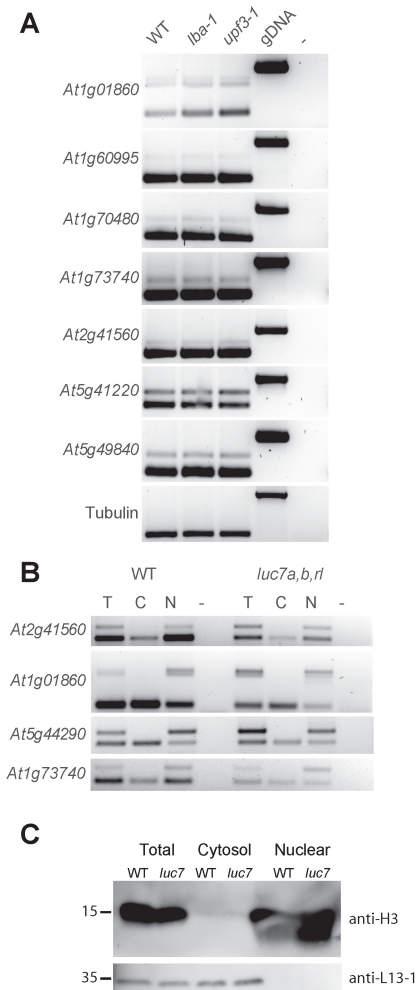

## FIGURE 7

**Figure 7: mRNAs containing retained LUC7-dependent introns are NMD-insensitive and remain nuclear.**

**A:** RT-PCR analysis of LUC7-dependent introns in WT and NMD mutants (*lba1* and *upf3-1*).

**B:** Splicing patterns of mRNAs isolated from total (T), cytosolic (C) and nuclear (N) fractions.

**C:** Immunoblot analysis of proteins isolated from total, cytosolic and nuclear fractions. Blots were probed with antibodies against histone H3 and a ribosomal protein, L13-1.

347

348

### 349 Splicing of LUC7-dependent introns can be modulated by stress

350 Our results revealed that a subset of alternatively spliced introns requires LUC7

351 proteins for efficient splicing and that splicing of these introns is a prerequisite for

352 nuclear export. This mechanism could serve as a nuclear quality control step to

353 prevent that unspliced mRNAs are exported prematurely. Interestingly, a GO analysis

354 of genes containing LUC7-dependent introns indicated an enrichment for stress

355 related genes (Figure S7). This prompted us to speculate that nuclear retention of

356 mRNAs could be exploited as a regulatory mechanism to fine-tune gene expression  
357 under stress conditions.

358         To test this hypothesis, we decided to check the splicing of some LUC7-  
359 dependent introns in WT under stress condition. We chose cold stress because *luc7*  
360 mutants are cold-sensitive (Figure 2) and in addition, it was suggested that U1  
361 snRNP functionality is impaired under cold condition (Schlaen et al., 2015). To  
362 quantify the amount of unspliced isoforms in cold condition, we designed qPCR-  
363 primers specific to unspliced isoforms and the total mRNA pool and calculate the  
364 relative amount of mRNA carrying unspliced LUC7-dependent introns compared to  
365 the total mRNA pool. mRNAs of *At1g70480*, *At2g41560* and *At5g44290* significantly  
366 accumulated unspliced isoforms in responses to cold treatment demonstrating that  
367 cold stress modulates the splicing efficiency of these LUC7-dependent introns  
368 (Figure 8A). Interestingly, the amount of unspliced mRNA in *luc7* triple mutants does  
369 not differ significantly between mock and stress conditions (Figure 8A). This  
370 observation suggests that LUC7 is directly involved in the regulation of intron splicing  
371 under stress conditions and that LUC7 might be a target for stress response  
372 pathways.

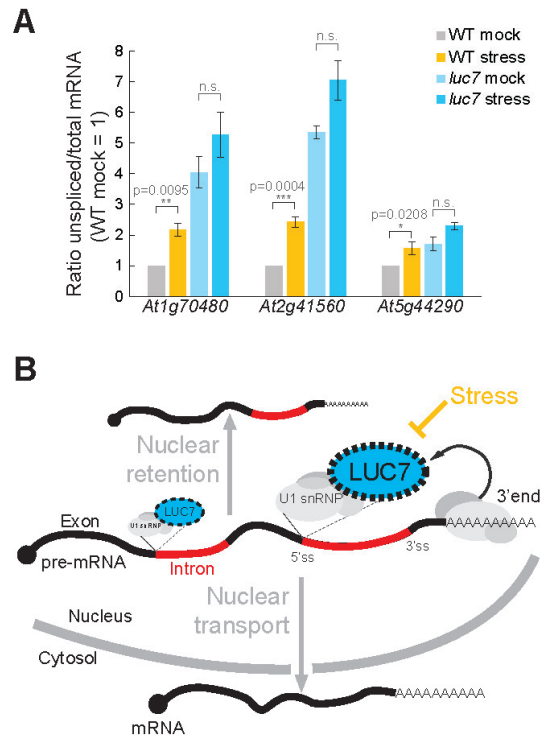

## FIGURE 8

### Figure 8: Splicing of LUC7 dependent introns can be modulated by stress.

**A:** Seven days old WT and *luc7* triple mutant seedlings were exposed to cold for 60 min. Splicing ratios (unspliced/total RNA) of four genes featuring a LUC7-dependent introns was analyzed by qPCR. A T-test was performed for statistical analysis.

**B:** Model for the proposed function of LUC7 in Arabidopsis.

373

374

375 **Discussion**

376 **Functions of the Arabidopsis U1 snRNP component LUC7**

377 For this study, we generated an Arabidopsis triple mutant deficient in the U1 snRNP  
378 components LUC7 and dissected the genome-wide effects of LUC7s impairments on  
379 the Arabidopsis transcriptome. Our results show that LUC7 proteins are *bona-fide* U1  
380 components acting mainly redundantly. The reduction of U1 function in the *luc7* triple  
381 mutant affects constitutive splicing. A large number of introns are retained in *luc7*  
382 triple mutant, suggesting that without a proper recognition of the 5'ss, splicing of the  
383 affected introns is impaired. Our results also show that exon-skipping events are  
384 impaired in *luc7* triple mutant, revealing that a functional plant U1 snRNP is essential  
385 for exon definition. In addition, we show that *luc7* triple mutant affect alternative  
386 splicing also by influencing events of alternative 5' and 3' splice site. This implies that  
387 the U1 snRNP does not only affect 5' splice site usage, it might also indirectly  
388 regulate usage of 3' splice sites via its interaction with U2AFs and the U2 snRNP  
389 (Hoffman and Grabowski, 1992; Shao et al., 2012). The functions of LUC7 proteins  
390 on the Arabidopsis transcriptome are likely to be underestimated, because  
391 misspliced mRNAs in *luc7* mutants might contain hallmarks of NMD and are  
392 therefore rapidly turned over and escape detection. Analysis of *luc7* mutants  
393 combined with mutations in NMD factors would help to uncover the full set of splicing  
394 events affected by LUC7. Furthermore, we found that in our RNA-seq experiments  
395 that while the chosen *luc7rl* allele is a RNA-null allele, the *luc7a* and *luc7b* alleles still  
396 produced mRNAs that might be translated into truncated proteins. Hence, we can not  
397 exclude that a true *luc7* null mutant might exhibit even more severe mutant  
398 phenotypes and splicing defects. One has also to consider that U1 snRNP  
399 independent splicing has been described in animals, indicating that not all introns

400 require the U1 complex for efficient intron removal (Fukumura et al., 2009). The  
401 degree of U1-independent splicing in plants remains to be elucidated.

402 Duplications among genes encoding for U1 snRNP proteins, such as the  
403 LUC7 genes, open up a possibility for sub- and neofunctionalization of U1 accessory  
404 proteins. Furthermore, the Arabidopsis genome encodes 14 potential U1 snRNAs,  
405 which slightly differ in sequence (Wang and Brendel, 2004). Therefore, the plant U1  
406 snRNP presumably does not exist as a single complex, but might exist as different  
407 sub-complexes exhibiting distinct specificities and functions. In metazoans, the  
408 existence of at least four different U1 snRNP subcomplex has been suggested  
409 (Hernandez et al., 2009; Guiro and O'Reilly, 2015). Specific combinations of plant U1  
410 protein family members and U1 snRNAs could generate an even higher number of  
411 such U1 subcomplexes, which could be responsible for specific splicing events. Our  
412 results show that LUC7 can act redundantly, but can also fulfill specific functions,  
413 suggesting that LUC7 complexes specifically act on certain pre-mRNAs. In this  
414 regard, it is important to note that an additional short stretch of amino acids  
415 separates the two zinc-finger domains in LUCA and LUC7B (Figure S1). Changing  
416 the space in between RNA binding domains affects substrate specificities and could  
417 explain different specificities among LUC7 proteins (Chen and Varani, 2013).

418

#### 419 **LUC7 function in terminal intron splicing**

420 Interestingly, *luc7* triple mutant showed a significant higher retention rate of terminal  
421 introns compared to first or middle introns. This was surprising because LUC7 was  
422 initially found to act in concert with the CBC, a complex involved in the removal of  
423 cap-proximal first introns, but not of last introns (Lewis et al., 1996). We found LUC7  
424 in a complex with the CBC and the CBC-associated protein SE also in Arabidopsis.

425 However, the functional significance of the of LUC7-CBC/SE interaction remains to  
426 be established.

427 Often, the removal of terminal introns is coupled to polyadenylation (Cooke et  
428 al., 1999; Cooke and Alwine, 2002; Rigo and Martinson, 2008). Interestingly, we  
429 detected components involved in RNA 3'end processing or polyA-binding as part of  
430 LUC7A complexes, suggesting that such interactions may contribute to the specific  
431 functions of LUC7 in terminal intron splicing. We found LUC7 in complexes with  
432 RBP47C, a polyA-binding protein of unknown function (Lorkovic et al., 2000), and  
433 LARP6, which is targeted to 3'ends of mRNA through interaction with polyA-binding  
434 protein 2 (PAB2) (Merret et al., 2013). Interestingly, we also found an SPT6-like  
435 transcription factor associated with LUC7 complexes. SPT6 binds the pol II C-  
436 terminal domain (CTD) phosphorylated at serine 2 (Ser2P), which accumulates at  
437 3'end of genes (Kaplan et al., 2000; Sun et al., 2010). None of these LUC7 complex  
438 components has been studied functionally and it will be a major effort for future  
439 studies to determine the function of these proteins in terminal intron splicing.

440

#### 441 **Possible functions of regulated intron retention for plant stress responses**

442 We found that splicing of LUC7-dependent introns is required for transport of mRNAs  
443 from the nucleus to the cytosol. The fact that we cannot detect unspliced transcript in  
444 the cytosol suggests a nuclear retention mechanism for such mRNAs. One possibility  
445 is that LUC7-dependent introns might contain binding sites for specific trans-  
446 regulatory factors that upon binding inhibit export. Polypyrimidine tract-binding  
447 protein 1 (PTB1) is a candidate for such a trans-regulatory protein, because binding  
448 of PTB1 to introns represses nuclear export of certain RNAs (Yap et al., 2012; Roy et  
449 al., 2013).

450 Nuclear retention of unspliced mRNAs might be a much more general  
451 mechanism to escape NMD and to regulate gene expression (Marquez et al., 2015;  
452 Wong et al., 2016). In plants, some specific transcript isoforms have been detected  
453 only in the nucleus, but not in the cytosol (Gohring et al., 2014). Also in metazoans,  
454 intron retention might have a more general role in regulating gene expression (Yap et  
455 al., 2012; Braunschweig et al., 2014; Pimentel et al., 2016; Naro et al., 2017). The  
456 so-called detained introns are evolutionary conserved, NMD insensitive and retained  
457 in the nucleus (Boutz et al., 2015). The functional importance of intron retention was  
458 also suggested in the fern *Marsilea vestita*, in which many mRNAs contain introns  
459 that are only spliced shortly before gametophyte development (Boothby et al., 2013).

460 We found that splicing of LUC7 dependent introns can be modulated by cold  
461 stress. Because retention of these introns causes nuclear trapping, it is prompting to  
462 speculate that environmental cues affect splicing and nuclear retention of mRNAs.  
463 Such a mechanism would regulate the amount of translatable mRNAs in the cytosol  
464 in a cost-efficient and rapid manner (Figure 8B). Since the stress-dependent  
465 regulation of splicing of LUC7-dependent introns is lost in *luc7* mutants, one can  
466 expect that LUC7 function might be regulated under stress conditions. Interestingly,  
467 the RS domains of LUC7 proteins are phosphorylated and we identified three kinases  
468 as potential LUC7A interactors (Heazlewood et al., 2008; Durek et al., 2010). In  
469 addition, stress signaling triggered by the phytohormone ABA causes differential  
470 phosphorylation of several splicing factors (Umezawa et al., 2013; Wang et al.,  
471 2013). Whether stress-induced changes in phosphorylation play a role in regulating  
472 LUC7 proteins and whether the LUC7-interacting kinases here identified are involved  
473 in this process remains to be elucidated.

474 **Material and Methods**

475

476 **Plant material and growth conditions**

477 All mutants were in the Columbia-0 (Col-0) background. *luc7a-1* (SAIL\_596\_H02)  
478 and *luc7a-2* (SAIL\_776\_F02), *luc7b-1* (SALK\_144681), *luc7rl-1* (SALK\_077718) and  
479 *luc7rl-2* (SALK\_130892C) were isolated by PCR-based genotyping (Table S7). *luc7*  
480 double and triple mutants were generate by crossing individual mutants. All other  
481 mutants used in this study (*abh1-285*, *cbp20-1*, *se-1*, *lba-1* and *upf3-1*) were  
482 described elsewhere (Prigge and Wagner, 2001; Papp et al., 2004; Hori and  
483 Watanabe, 2005; Yoine et al., 2006; Laubinger et al., 2008). The line expressing  
484 GFP was generated using the vector pBinarGFP and was kindly provided by Dr.  
485 Andreas Wachter (Wachter et al., 2007). For complementation analyses,  
486 *pLUC7A:LUC7A-FLAG*, *pLUC7B:LUC7B-FLAG*, *pLUC7RL:LUC7RL-FLAG* and  
487 *pLUC7A:LUC7A-YFP* constructs were introduced in *luc7* triple mutant by  
488 *Agrobacterium*-mediated transformation (Clough and Bent, 1998). All plants were  
489 grown on soil in long days conditions (16-h light/8-h dark) at 20°C/18°C day/night.  
490 The size of *luc7* mutants was assessed by measuring the longest rosette leaf after 21  
491 days. For all molecular studies, seeds were surface-sterilized, plated on 1/2 MS  
492 medium with 0.8% phytoagar and grown for 7 days in continuous light at 22°C. For  
493 the cold treatment, plates with *Arabidopsis* seedlings were transferred to ice-water for  
494 60 min. For the root growth assay, 4 days old seedlings growing on vertical plates  
495 were transferred to mock plates or plates containing indicated amount of NaCl and  
496 grown for more 11 days vertically. Root growth rate per day was assessed by  
497 measuring in ImageJ the root length in the days 2 and 9 after transfer. For ABA  
498 sensitivity assays, seedlings were grown for 10 days on 1/2 MS plates supplemented  
499 with 0.8 % phytoagar, 1 % sucrose and indicated amounts of ABA (+) (Sigma -



500 A4906). For cold stress experiments, seeds were grown at 20°C for 5 days and then  
501 transferred to 8°C for two weeks.

502

### 503 **Plasmid constructions and transient expression analyses**

504 For the expression of C-terminal FLAG- and YFP-tagged LUC7 proteins expressed  
505 from their endogenous regulatory elements, 2100 bp, 4120 bp and 2106 bp upstream  
506 of the ATG start codon of *LUC7A*, *LUC7B* and *LUC7RL*, respectively, to the last  
507 coding nucleotide were PCR-amplified and subcloned in pCR8/GW/TOPO®  
508 (Invitrogen). Oligonucleotides are listed in Table S7. Entry clones were recombined  
509 with pGWB10 and pGWB540 using Gateway LR clonase II (Invitrogen) to generate  
510 binary plasmids containing *pLUC7A:LUC7A-FLAG*, *pLUC7B:LUC7B-FLAG*,  
511 *pLUC7RL:LUC7RL-FLAG* and *pLUC7A:LUC7A-YFP*. For the co-localization studies,  
512 entry vector containing the coding sequence of U1-70k was recombined with  
513 pGWB654 for the expression of *p35S:U1-70k-mRFP* (Nakagawa et al., 2007).  
514 *Agrobacterium*-mediated transient transformation of *Nicotiana benthamiana* plants  
515 was conducted as following. Overnight *Agrobacterium* culture were diluted in 1:6 and  
516 grown for 4 hours at 28°C. After centrifugation, pellets were resuspended in  
517 infiltration medium (10 mM MgCl<sub>2</sub>, 10 mM MES-KOH pH 5.6, 100 μM  
518 Acetosyringone). The OD 600nm was adjusted to 0.6-0.8 and samples were mixed  
519 when required. *N. benthamiana* were infiltrated and subcellular localization was  
520 checked after 3 days. Subcellular localization of fluorescent proteins was analyzed by  
521 confocal microscopy using a Leica TCS SP8.

522

### 523 **Phylogenetic analysis**

524 *AthLUC7A* (AT3G03340) protein sequence was analyzed in Interpro  
525 (<https://www.ebi.ac.uk/interpro/>) to retrieve the Interpro ID for the conserved Luc7-

526 related domain (IPR004882). The sequence for *Saccharomyces cerevisiae* (strain  
527 ATCC 204508\_S288c) was obtained in Interpro. Plants sequences were extracted  
528 using BioMart selecting for the protein domain IPR004882 on Ensembl Plants  
529 (<http://plants.ensembl.org/>). The following genomes were included in our analyses:  
530 *Amborella trichopoda* (AMTR1.0 (2014-01-AGD)); *Arabidopsis thaliana* (TAIR10  
531 (2010-09-TAIR10)); *Brachypodium distachyon* (v1.0); *Chlamydomonas reinhardtii*  
532 (v3.1 (2007-11-ENA)); *Physcomitrella patens* (ASM242v1 (2011-03-Phypa1.6));  
533 *Selaginella moellendorffii* (v1.0 (2011-05-ENA)); *Oryza sativa Japonica* (IRGSP-1.0);  
534 and *Ostreococcus lucimarinus* genes (ASM9206v1). The phylogenetic analysis was  
535 performed in Seaview (Version 4.6.1) using Muscle for sequence alignment.  
536 Maximum likelihood (PhyML) was employed with 1000 bootstraps (Gouy et al., 2010).

537

### 538 **RNA extractions, RT-PCR and qRT-PCR**

539 RNAs extractions were performed with Direct-zol™ RNA MiniPrep Kit (Zymo  
540 Research). Total RNAs were treated with DNase I and cDNA synthesis carried out  
541 with RevertAid First Strand cDNA Synthesis Kit (Thermo Scientific) using usually  
542 oligo dT primers or a mixture of hexamer and miRNA-specific stem-loop primers  
543 (Table S7). Standard PCRs for the splicing analysis were performed with DreamTaq  
544 DNA Polymerase (Thermo Scientific). Quantitative RT-PCR (qRT-PCR) was  
545 performed using the Maxima SYBR Green (Thermo Scientific) in a Bio-Rad CFX 384.  
546 For all qPCR-primers, primer efficiencies were determined by a serial dilution of  
547 cDNA template. The relative expressions were calculated using the  $2^{(-\Delta\Delta CT)}$   
548 method with *PP2A* or *ACTIN* as control. For the qRT-PCR to detect splicing ratio  
549 changes under cold condition, the ratio  $2^{(-\Delta CT_{\text{unspliced}})}/2^{(-\Delta CT_{\text{total RNA}})}$  was  
550 calculated separately for each replicate and t-test was performed before calculating  
551 the relative to WT mock. Oligonucleotides are listed in Table S7. For RNA-

552 sequencing analysis, polyA RNAs were enriched from 4 µg of total RNAs using  
553 NEBNext Oligo d(T)<sub>25</sub> Magnetic Beads (New England Biolabs). The libraries were  
554 prepared using ScriptSeq™ Plant Leaf kit (Epicentre) following the manufacturer's  
555 instruction. Single end sequencing was performed on an Illumina HiSeq2000.  
556 Sequencing data were deposited at Gene Expression Omnibus under accession  
557 number GSE98779.

558

559

## 560 **RNA-seq libraries: Mapping, differential expression analysis and splicing**

### 561 **analysis**

562 RNA-seq reads for each replicate were aligned against the *Arabidopsis thaliana*  
563 reference sequence (TAIR10) using tophat (v2.0.10, -p2, -a 10, -g 10, -N 10, --read-  
564 edit-dist 10, --library-type fr-secondstrand, --segment-length 31, -G TAIR10.gff). Next,  
565 cufflinks (version 2.2.1) was used to extract FPKM counts for each expressed  
566 transcript generating a new annotation file (transcripts.gtf), where the coordinates of  
567 each expressed transcript can be found. Cuffcompare (version 2.2.1) was then used  
568 to generate a non-redundant annotation file containing all reference transcripts in  
569 addition to new transcripts expressed in at least one of the nine samples  
570 (cuffcmp.combined.gtf). The differential expression analysis was performed with  
571 cuffdiff (version 2.2.1) between *wt/luc7* triple using the annotation file generated by  
572 cuffcompare (false discovery rate (FDR) < 0.05 and fold change (FC) > 2). For the  
573 splicing analysis, the same alignment files generated by tophat and annotation files  
574 generated by cuffcompare (cuffcmp.combined.gtf) were used as input for MATS  
575 (version 3.0.8) in order to test for differentially spliced transcripts (Shen et al., 2014).

576

### 577 **Subcellular fractionation**

578 Two grams of seedlings were ground in N<sub>2</sub> liquid and resuspended in 4 ml of Honda  
579 buffer (0.44 M sucrose, 1.25% Ficoll 400, 2.5% Dextran T40, 20 mM HEPES KOH  
580 pH 7.4, 10 mM MgCl<sub>2</sub>, 0.5% Triton X-100, 5 mM DTT, 1 mM PMSF, protease  
581 inhibitor cocktail (Roche) supplemented with 40U/ml of Ribolock®). The homogenate  
582 was filtered through 2 layer of Miracloth, which was washed with 1ml of Honda  
583 Buffer. From the filtrate, 300 µl was removed as “total” fraction and kept on ice.  
584 Filtrates were centrifuged at 1,500 g for 10 min, 4°C for pelleting nuclei and  
585 supernatants were transferred to a new tube. Supernatants were centrifuged at 13  
586 000 x g, 4 °C, 15 min and 300 µl were kept on ice as cytoplasmic fraction. Nuclei  
587 pellets were washed five times in 1 ml of Honda buffer (supplemented with 8U/ml of  
588 Ribolock®, centrifugation at 1,800 g for 5 min. The final pellet was resuspended in  
589 300 µl of Honda buffer. To all the fractions (total, cytoplasmic and nuclei), 900 µl of  
590 TRI Reagent (Sigma) was added. After homogenization, 180 µl of chloroform was  
591 added and samples were incubated at room temperature for 10 min. After  
592 centrifugation at 10 000 rpm for 20 min, 4°C, the aqueous phase were transferred to  
593 a new tube and RNA extracted with Direct-zol™ RNA MiniPrep Kit (Zymo Research).  
594 The organic phase was collected and proteins were isolated according to  
595 manufacturer’s instructions. cDNA synthesis with random primes was performed as  
596 above. Proteins extracted were analyzed by standard western blot techniques using  
597 the following antibodies: H3 (~ 17 KDa / ab 1791, Abcam) and 60S ribosomal (~ 23,7-  
598 29 KDa / L13, Agrisera).

599

### 600 **RNA immunoprecipitation**

601 RNA immunoprecipitation (RIP) using WT and a *pLUC7A:LUC7A-eYFP* rescue line  
602 was performed as described elsewhere with minor modifications (Rowley et al., 2013;  
603 Xing et al., 2015). Isolated nuclei were sonicated in nuclear lysis buffer in a Covaris

604 E220 (Duty Cycle: 20%; Peak intensity: 140; Cycles per Burst: 200; Cycle time: 3').  
605 RNAs were extracted using RNeasy Plant Mini Kit (QIAGEN) following the  
606 manufacturer's instructions. The RNA were treated with DNaseI (Thermo Scientific)  
607 and samples were split in half for the (-)RT reaction. cDNA synthesis were perform  
608 with SuperScript™ III Reverse Transcriptase (Invitrogen). qRT-PCRs were performed  
609 with QuantiNova™ SYBRR Green PCR (QIAGEN).

610

### 611 **GO Analysis**

612 GO analysis was performed in Bar Utoronto ([http://bar.utoronto.ca/ntools/cgi-](http://bar.utoronto.ca/ntools/cgi-bin/ntools_classification_superviewer.cgi)  
613 [bin/ntools\\_classification\\_superviewer.cgi](http://bar.utoronto.ca/ntools_classification_superviewer.cgi)).

614

### 615 **Protein complex purification and mass spectrometry (MS) Analysis**

616 LUC7A immunoprecipitation was performed using a complemented line  
617 *pLUC7A:LUC7A-eYFP* (line 20.3.1) and a transgenic *p35S:GFP* and WT as controls.  
618 Four independent biological replicates were performed. Seedlings (4 g) were ground  
619 in N<sub>2</sub> liquid and resuspended in 1 volumes of extraction buffer (50 mM Tris-Cl pH  
620 7.5, 100 mM NaCl, 0.5 % Triton X-100, 5 % Glycerol, 1 mM PMSF, 100 μM MG132,  
621 Complete Protease Inhibitor Cocktail EDTA-free [Roche] and Plant specific protease  
622 Inhibitor, Sigma P9599). After thawing, samples were incubated on ice for 30 min,  
623 centrifuged at 3220 rcf for 30 min at 4°C and filtrated with two layers of Miracloth. For  
624 each immunoprecipitation, 20 μl of GFP-trap (Chromotek) was washed twice with 1  
625 ml of washing buffer (50 mM Tris-Cl pH 7.5, 100 mM NaCl, 0.2 % Triton X-100) and  
626 once with 0.5 ml of IP buffer. For each replicate, the same amount of plant extracts  
627 (~5 ml) were incubated with GFP-trap and incubated on a rotating wheel at 4°C for 3  
628 hours. Samples were centrifuged at 800-2000 rcf for 1-2 min and the supernatant  
629 discarded. GFP-beads were resuspended in 1 ml of washing buffer, transferred into a

630 new tube and washed 4 to 5 times. Then, beads were resuspended in ~40 µl of 2x  
631 Laemmli Buffer and incubated at 80°C for 10 min. Short gel purifications (SDS-  
632 PAGE) were performed and gels slices were digested with Trypsin. LC-MS/MS  
633 analyses were performed in two mass spectrometer. Samples from R10 to R14 were  
634 analyzed on a Proxeon Easy-nLC coupled to Orbitrap Elite (method: 90min, Top10,  
635 HCD). Samples from R15 to R17 were analysed on a Proxeon Easy-nLC coupled to  
636 OrbitrapXL (method: 90min, Top10, CID). Samples from R18 to R20 analysis on a  
637 Proxeon Easy-nLC coupled to OrbitrapXL (method: 130min, Top10, CID). All the  
638 replicates were processed together on MaxQuant software (Version 1.5.2.8. with  
639 integrated Andromeda Peptide search engine) with a setting of 1% FDR and the  
640 spectra were searched against an *Arabidopsis thaliana* Uniprot database  
641 (UP000006548\_3702\_complete\_20151023.fasta). All peptides identified are listed in  
642 Supplementary Table S1 and raw data were deposited publically (accession  
643 PXD006127). For co-immunoprecipitation experiments shown in Figure S4,  
644 experiments were conducted as described above and IPed protein fractions were  
645 analyzed using SDS-PAGE followed by detection with GFP- (Roche), SE- (Agrisera)  
646 and CBP80- (Agrisera) specific antibodies.

647

## 648 **Acknowledgments**

649 This work was supported by the Deutsche Forschungsgemeinschaft DFG (to S.L.,  
650 LA2633-4/1), Coordenação de Aperfeiçoamento de Pessoal de Nível Superior  
651 (CAPES - Brazil) for doctoral fellowship (to M.F.A.), the Max Planck Society (to K.S.),  
652 the Max Planck Society Chemical Genomics Centre (CGC) through its supporting  
653 companies AstraZeneca, Bayer CropScience, Bayer Healthcare, Boehringer-  
654 Ingelheim and Merck (to S.L). We are grateful to Andreas Wachter (ZMBP, University  
655 of Tuebingen, Germany) and members of the lab for critical reading of the

656 manuscript, Christa Lanz for her invaluable help with Illumina sequencing, and  
657 Johanna Schröter and her team for excellent care of our plants, Anja Hoffmann for  
658 excellent technical assistance, and Andreas Wachter (ZMBP, University of  
659 Tuebingen, Germany), Tsuyoshi Nakagawa (Department of Molecular and Functional  
660 Genomics, Center for Integrated Research in Science, Shimane University, Matsue,  
661 Japan) and the Nottingham Arabidopsis Stock Centre for providing seeds and DNA  
662 constructs.

663

#### 664 **Author contributions**

665 M.d.F.A. and S.L. designed research. M.d.F.A., A.G.F.-M., I.D-B. and S.L. performed  
666 experiments. E.-M. W., M.d.F.A., A.G.F.-M., I.D-B., B.M., K.S. and S.L. analyzed the  
667 data. M.d.F.A. and S.L. wrote the manuscript with contributions from all authors.

668

#### 669 **Conflict of interest**

670 The authors declare no conflict of interest.

671

#### 672 **Figure legends**

#### 673 **Figure 1: *Arabidopsis* LUC7 proteins redundantly control plant development**

674 **A:** Phylogenetic analysis of LUC7 proteins in the plant kingdom using  
675 *Saccharomyces cerevisiae* as an external group.

676 **B:** Exon/intron structure of *Arabidopsis thaliana* *LUC7A*, *LUC7B* and *LUC7RL*.  
677 Dotted lines indicate the positions of T-DNA insertions.

678 **C:** WT and *luc7* triple mutant plants 21 days (left) and 45 days (right) after  
679 germination.



680 **D:** Length of the longest rosette leaf of 21 days-old WT, *luc7* single, double and triple  
681 mutant plants growing under long day conditions. Leaves of 10-15 individual plants  
682 were measured. Dots indicate individual data points.

683 **E:** Complementation of *luc7a,b,rl* mutants by *LUC7A*, *LUC7B* and *LUC7RL* genomic  
684 rescue constructs. Transformation of an “empty” binary vector served as a control.  
685 Two independent transgenic lines for each construct are shown.

686

687 **Figure 2: *Arabidopsis* LUC7 is involved in ABA signaling and salt stress**  
688 **responses**

689 **A,B:** WT, *luc7* triple mutant and a *luc7* rescue line (*luc7a,b,rl*; *pLUC7A:LUC7A-YFP*)  
690 were grown on half-strength MS plates containing 1% sucrose and indicated amount  
691 of ABA. Seedling phenotypes (A) and quantification of seedlings with green  
692 cotyledons (B) are shown. Green cotyledons were scored ten days after germination.  
693 One of two biological replicates is shown.

694 **C,D:** WT, *luc7* triple mutant and a *luc7* rescue line (*luc7a,b,rl*; *pLUC7A:LUC7A-YFP*)  
695 were germinated on half-strength MS vertical plates and seedling were transferred on  
696 half-strength MS plates containing the indicated amount of NaCl. Plates were always  
697 placed vertically and the root growth was scored over 7 days. Phenotypes (C) and  
698 root length quantification (D) are shown.

699 **E:** Gross phenotype of WT, *luc7* triple mutant and a *luc7* rescue line grown at 22°C  
700 and 8°C.

701

702 **Figure 3: *Arabidopsis* LUC7 is an U1 snRNP component**

703 **A:** RNA immunoprecipitation using a *pLUC7A:LUC7A-YFP*, *luc7a,b,rl* complemented  
704 line. Proteins were immunoprecipitated using GFP-specific affinity matrix and RNAs  
705 were extracted from the input and the immunoprecipitated fraction. U1, U2, U3



706 snRNAs and *ACTIN* RNA were quantified using qRT-PCR. Enrichment of the  
707 respective RNA in *LUC7A:LUC7A-YFP luc7a,b,rl* transgenic line was calculated over  
708 WT (negative control). Error bars denote the range of two biological replicates.

709 **B:** Subcellular localization of LUC7A in *pLUC7A:LUC7A-YFP luc7a,b,rl* in  
710 Arabidopsis transgenic plants. Roots of 9 day-old seedlings were analyzed using  
711 confocal microscopy. Scale bar indicates 25  $\mu$ m.

712 **C:** U1-70K-mRFP and LUC7A-YFP or LUC7RL-YFP proteins were transiently  
713 expressed in *N. benthamiana*. The subcellular localization of mRFP and YFP fusion  
714 proteins was analyzed using confocal microscopy. Scale bars indicate 10  $\mu$ m and 25  
715  $\mu$ m for upper and lower panel, respectively.

716

717 **Figure 4: Mutations in *LUC7* result in misexpression of protein-coding and non-**  
718 **coding genes, but not in *MIRNA* genes**

719 **A:** Differentially expressed genes in *luc7a,b,rl* mutant compared to WT.

720 **B,C:** qRT-PCR analysis of selected ncRNA (**B**) and miRNAs (**C**) in WT and  
721 *luc7a,b,rl*. Error bars denote the SEM (n=3).

722

723 **Figure 5: Global analysis of splicing defects in *luc7* triple mutant.**

724 **A:** Classification of splicing events changes in *luc7* triple mutant compared to WT.

725 **B-F:** Coverage plots and RT-PCR validation experiments for selected splicing events  
726 in WT and *luc7* triple mutant. Genomic DNA (gDNA) or water (-) served as a control.  
727 Primer positions are indicated with gray arrows. IR, intron retention; ES, exon  
728 skipping; Alt.3'SS, alternative 3'splicing site; Alt.5'SS, alternative 5'splicing site.

729

730 **Figure 6: LUC7 proteins have a pronounced effect on terminal intron splicing**

731 **A:** RT-PCR analysis of LUC7-dependent introns in WT, *luc7* triple mutant, *cbp80*,  
732 *cbp20* and *se-1* mutants.

733 **B:** RT-PCR analysis of CBC/SE-dependent introns in WT, *luc7* triple mutant, *cbp80*,  
734 *cbp20* and *se-1* mutants.

735 **C:** Classification of intron retention according to the intron position (first, middle, or  
736 last). Only genes with 3 or more introns were considered for this analysis.

737 **D:** RT-PCR analysis of genes carrying retained terminal introns in WT and *luc7* triple  
738 mutants.

739

740 **Figure 7: mRNAs containing retained LUC7-dependent introns are NMD-**  
741 **insensitive and remain nuclear.**

742 **A:** RT-PCR analysis of LUC7-dependent introns in WT and NMD mutants (*lba1* and  
743 *upf3-1*).

744 **B:** Splicing patterns of mRNAs isolated from total (T), cytosolic (C) and nuclear (N)  
745 fractions.

746 **C:** Immunoblot analysis of proteins isolated from total, cytosolic and nuclear  
747 fractions. Blots were probed with antibodies against histone H3 and a ribosomal  
748 protein, L13-1.

749

750 **Figure 8: Splicing of LUC7 dependent introns can be modulated by stress.**

751 **A:** Seven days old WT and *luc7* triple mutant seedlings were exposed to cold for 60  
752 min. Splicing ratios (unspliced/total RNA) of four genes featuring a LUC7-dependent  
753 intron was analyzed by qPCR. A T-test was performed for statistical analysis.

754 **B:** Model for the proposed function of LUC7 in Arabidopsis.

755

756 **Table 1: List of selected potential LUC7A interacting proteins identified in**  
757 **immunoprecipitation experiments followed by MS analysis.**

758

759 **Supplementary Material**

760 Figure S1-S8, Table S1-S7

761

762 **Literature**

- 763 **Almada, A.E., Wu, X., Kriz, A.J., Burge, C.B., and Sharp, P.A.** (2013). Promoter  
764 directionality is controlled by U1 snRNP and polyadenylation signals. *Nature*  
765 **499**, 360-363.
- 766 **AlShareef, S., Ling, Y., Butt, H., Mariappan, K.G., Benhamed, M., and Mahfouz,**  
767 **M.M.** (2017). Herboxidiene triggers splicing repression and abiotic stress  
768 responses in plants. *BMC genomics* **18**, 260.
- 769 **Berg, M.G., Singh, L.N., Younis, I., Liu, Q., Pinto, A.M., Kaida, D., Zhang, Z.,**  
770 **Cho, S., Sherrill-Mix, S., Wan, L., and Dreyfuss, G.** (2012). U1 snRNP  
771 determines mRNA length and regulates isoform expression. *Cell* **150**, 53-64.
- 772 **Bielewicz, D., Kalak, M., Kalyna, M., Windels, D., Barta, A., Vazquez, F.,**  
773 **Szweykowska-Kulinska, Z., and Jarmolowski, A.** (2013). Introns of plant  
774 pri-miRNAs enhance miRNA biogenesis. *EMBO reports* **14**, 622-628.
- 775 **Boothby, T.C., Zipper, R.S., van der Weele, C.M., and Wolniak, S.M.** (2013).  
776 Removal of retained introns regulates translation in the rapidly developing  
777 gametophyte of *Marsilea vestita*. *Developmental cell* **24**, 517-529.
- 778 **Boutz, P.L., Bhutkar, A., and Sharp, P.A.** (2015). Detained introns are a novel,  
779 widespread class of post-transcriptionally spliced introns. *Genes &*  
780 *development* **29**, 63-80.
- 781 **Braunschweig, U., Barbosa-Morais, N.L., Pan, Q., Nachman, E.N., Alipanahi, B.,**  
782 **Gonatosopoulos-Pournatzis, T., Frey, B., Irimia, M., and Blencowe, B.J.**  
783 (2014). Widespread intron retention in mammals functionally tunes  
784 transcriptomes. *Genome research* **24**, 1774-1786.
- 785 **Carvalho, R.F., Feijao, C.V., and Duque, P.** (2013). On the physiological  
786 significance of alternative splicing events in higher plants. *Protoplasma* **250**,  
787 639-650.
- 788 **Chen, Y., and Varani, G.** (2013). Engineering RNA-binding proteins for biology. *The*  
789 *FEBS journal* **280**, 3734-3754.
- 790 **Cho, S., Hoang, A., Sinha, R., Zhong, X.Y., Fu, X.D., Krainer, A.R., and Ghosh,**  
791 **G.** (2011). Interaction between the RNA binding domains of Ser-Arg splicing  
792 factor 1 and U1-70K snRNP protein determines early spliceosome assembly.  
793 *Proc Natl Acad Sci U S A* **108**, 8233-8238.
- 794 **Clough, S.J., and Bent, A.F.** (1998). Floral dip: a simplified method for  
795 *Agrobacterium*-mediated transformation of *Arabidopsis thaliana*. *The Plant*  
796 *journal : for cell and molecular biology* **16**, 735-743.
- 797 **Cooke, C., and Alwine, J.C.** (2002). Characterization of specific protein-RNA  
798 complexes associated with the coupling of polyadenylation and last-intron  
799 removal. *Molecular and cellular biology* **22**, 4579-4586.

- 800 **Cooke, C., Hans, H., and Alwine, J.C.** (1999). Utilization of splicing elements and  
801 polyadenylation signal elements in the coupling of polyadenylation and last-  
802 intron removal. *Molecular and cellular biology* **19**, 4971-4979.
- 803 **Drechsel, G., Kahles, A., Kesarwani, A.K., Stauffer, E., Behr, J., Drewe, P.,**  
804 **Ratsch, G., and Wachter, A.** (2013). Nonsense-mediated decay of alternative  
805 precursor mRNA splicing variants is a major determinant of the Arabidopsis  
806 steady state transcriptome. *Plant Cell* **25**, 3726-3742.
- 807 **Durek, P., Schmidt, R., Heazlewood, J.L., Jones, A., MacLean, D., Nagel, A.,**  
808 **Kersten, B., and Schulze, W.X.** (2010). PhosPhAt: the Arabidopsis thaliana  
809 phosphorylation site database. An update. *Nucleic acids research* **38**, D828-  
810 834.
- 811 **Filichkin, S., Priest, H.D., Megraw, M., and Mockler, T.C.** (2015). Alternative  
812 splicing in plants: directing traffic at the crossroads of adaptation and  
813 environmental stress. *Current opinion in plant biology* **24**, 125-135.
- 814 **Fortes, P., Kufel, J., Fornerod, M., Polycarpou-Schwarz, M., Lafontaine, D.,**  
815 **Tollervey, D., and Mattaj, I.W.** (1999a). Genetic and physical interactions  
816 involving the yeast nuclear cap-binding complex. *Molecular and cellular*  
817 *biology* **19**, 6543-6553.
- 818 **Fortes, P., Bilbao-Cortes, D., Fornerod, M., Rigaut, G., Raymond, W., Seraphin,**  
819 **B., and Mattaj, I.W.** (1999b). Luc7p, a novel yeast U1 snRNP protein with a  
820 role in 5' splice site recognition. *Genes & development* **13**, 2425-2438.
- 821 **Fukumura, K., Taniguchi, I., Sakamoto, H., Ohno, M., and Inoue, K.** (2009). U1-  
822 independent pre-mRNA splicing contributes to the regulation of alternative  
823 splicing. *Nucleic Acids Res* **37**, 1907-1914.
- 824 **Gohring, J., Jacak, J., and Barta, A.** (2014). Imaging of endogenous messenger  
825 RNA splice variants in living cells reveals nuclear retention of transcripts  
826 inaccessible to nonsense-mediated decay in Arabidopsis. *Plant Cell* **26**, 754-  
827 764.
- 828 **Golovkin, M., and Reddy, A.S.** (1998). The plant U1 small nuclear ribonucleoprotein  
829 particle 70K protein interacts with two novel serine/arginine-rich proteins. *Plant*  
830 *Cell* **10**, 1637-1648.
- 831 **Golovkin, M., and Reddy, A.S.** (2003). Expression of U1 small nuclear  
832 ribonucleoprotein 70K antisense transcript using APETALA3 promoter  
833 suppresses the development of sepals and petals. *Plant physiology* **132**,  
834 1884-1891.
- 835 **Gonatopoulos-Pournatzis, T., and Cowling, V.H.** (2014). Cap-binding complex  
836 (CBC). *The Biochemical journal* **457**, 231-242.
- 837 **Gouy, M., Guindon, S., and Gascuel, O.** (2010). SeaView version 4: A multiplatform  
838 graphical user interface for sequence alignment and phylogenetic tree  
839 building. *Molecular biology and evolution* **27**, 221-224.
- 840 **Gu, J., Xia, Z., Luo, Y., Jiang, X., Qian, B., Xie, H., Zhu, J.K., Xiong, L., Zhu, J.,**  
841 **and Wang, Z.Y.** (2017). Spliceosomal protein U1A is involved in alternative  
842 splicing and salt stress tolerance in Arabidopsis thaliana. *Nucleic Acids Res.*
- 843 **Guio, J., and O'Reilly, D.** (2015). Insights into the U1 small nuclear  
844 ribonucleoprotein complex superfamily. *Wires Rna* **6**, 79-92.
- 845 **Heazlewood, J.L., Durek, P., Hummel, J., Selbig, J., Weckwerth, W., Walther, D.,**  
846 **and Schulze, W.X.** (2008). PhosPhAt: a database of phosphorylation sites in  
847 Arabidopsis thaliana and a plant-specific phosphorylation site predictor.  
848 *Nucleic acids research* **36**, D1015-1021.
- 849 **Heim, A., Grimm, C., Muller, U., Haussler, S., Mackeen, M.M., Merl, J., Hauck,**  
850 **S.M., Kessler, B.M., Schofield, C.J., Wolf, A., and Bottger, A.** (2014).

- 851 Jumonji domain containing protein 6 (Jmjd6) modulates splicing and  
852 specifically interacts with arginine-serine-rich (RS) domains of SR- and SR-like  
853 proteins. *Nucleic Acids Res* **42**, 7833-7850.
- 854 **Hernandez, H., Makarova, O.V., Makarov, E.M., Morgner, N., Muto, Y., Krummel,**  
855 **D.P., and Robinson, C.V.** (2009). Isoforms of U1-70k control subunit  
856 dynamics in the human spliceosomal U1 snRNP. *PLoS one* **4**, e7202.
- 857 **Hoffman, B.E., and Grabowski, P.J.** (1992). U1 snRNP targets an essential splicing  
858 factor, U2AF65, to the 3' splice site by a network of interactions spanning the  
859 exon. *Genes & development* **6**, 2554-2568.
- 860 **Hori, K., and Watanabe, Y.** (2005). UPF3 suppresses aberrant spliced mRNA in  
861 Arabidopsis. *The Plant journal : for cell and molecular biology* **43**, 530-540.
- 862 **Kaida, D.** (2016). The reciprocal regulation between splicing and 3'-end processing.  
863 *Wiley Interdiscip Rev RNA* **7**, 499-511.
- 864 **Kaida, D., Berg, M.G., Younis, I., Kasim, M., Singh, L.N., Wan, L., and Dreyfuss,**  
865 **G.** (2010). U1 snRNP protects pre-mRNAs from premature cleavage and  
866 polyadenylation. *Nature* **468**, 664-668.
- 867 **Kalyna, M., Simpson, C.G., Syed, N.H., Lewandowska, D., Marquez, Y.,**  
868 **Kusenda, B., Marshall, J., Fuller, J., Cardle, L., McNicol, J., Dinh, H.Q.,**  
869 **Barta, A., and Brown, J.W.** (2012). Alternative splicing and nonsense-  
870 mediated decay modulate expression of important regulatory genes in  
871 Arabidopsis. *Nucleic Acids Res* **40**, 2454-2469.
- 872 **Kanno, T., Lin, W.D., Fu, J.L., Chang, C.L., Matzke, A.J.M., and Matzke, M.**  
873 (2017). A Genetic Screen for Pre-mRNA Splicing Mutants of Arabidopsis  
874 thaliana Identifies Putative U1 snRNP Components RBM25 and PRP39a.  
875 *Genetics* **207**, 1347-1359.
- 876 **Kaplan, C.D., Morris, J.R., Wu, C., and Winston, F.** (2000). Spt5 and spt6 are  
877 associated with active transcription and have characteristics of general  
878 elongation factors in *D. melanogaster*. *Genes & development* **14**, 2623-2634.
- 879 **Knop, K., Stepien, A., Barciszewska-Pacak, M., Taube, M., Bielewicz, D.,**  
880 **Michalak, M., Borst, J.W., Jarmolowski, A., and Szweykowska-Kulinska,**  
881 **Z.** (2016). Active 5' splice sites regulate the biogenesis efficiency of  
882 Arabidopsis microRNAs derived from intron-containing genes. *Nucleic Acids*  
883 *Res.*
- 884 **Koncz, C., Dejong, F., Villacorta, N., Szakonyi, D., and Koncz, Z.** (2012). The  
885 spliceosome-activating complex: molecular mechanisms underlying the  
886 function of a pleiotropic regulator. *Frontiers in plant science* **3**, 9.
- 887 **Kornblihtt, A.R., Schor, I.E., Allo, M., Dujardin, G., Petrillo, E., and Munoz, M.J.**  
888 (2013). Alternative splicing: a pivotal step between eukaryotic transcription  
889 and translation. *Nature reviews. Molecular cell biology* **14**, 153-165.
- 890 **Laubinger, S., Sachsenberg, T., Zeller, G., Busch, W., Lohmann, J.U., Ratsch,**  
891 **G., and Weigel, D.** (2008). Dual roles of the nuclear cap-binding complex and  
892 SERRATE in pre-mRNA splicing and microRNA processing in Arabidopsis  
893 thaliana. *Proc Natl Acad Sci U S A* **105**, 8795-8800.
- 894 **Lewis, J.D., Izaurralde, E., Jarmolowski, A., McGuigan, C., and Mattaj, I.W.**  
895 (1996). A nuclear cap-binding complex facilitates association of U1 snRNP  
896 with the cap-proximal 5' splice site. *Genes & Development* **10**, 1683-1698.
- 897 **Ling, Y., Alshareef, S., Butt, H., Lozano-Juste, J., Li, L., Galal, A.A., Moustafa,**  
898 **A., Momin, A.A., Tashkandi, M., Richardson, D.N., Fujii, H., Arold, S.,**  
899 **Rodriguez, P.L., Duque, P., and Mahfouz, M.M.** (2017). Pre-mRNA splicing  
900 repression triggers abiotic stress signaling in plants. *The Plant journal : for cell*  
901 *and molecular biology* **89**, 291-309.



- 902 **Lorkovic, Z.J., and Barta, A.** (2008). Role of Cajal bodies and nucleolus in the  
903 maturation of the U1 snRNP in Arabidopsis. *PLoS One* **3**, e3989.
- 904 **Lorkovic, Z.J., Wieczorek Kirk, D.A., Klahre, U., Hemmings-Mieszczak, M., and**  
905 **Filipowicz, W.** (2000). RBP45 and RBP47, two oligouridylate-specific hnRNP-  
906 like proteins interacting with poly(A)<sup>+</sup> RNA in nuclei of plant cells. *RNA* **6**,  
907 1610-1624.
- 908 **Marquez, Y., Hopfler, M., Ayatollahi, Z., Barta, A., and Kalyna, M.** (2015).  
909 Unmasking alternative splicing inside protein-coding exons defines exons  
910 and their role in proteome plasticity. *Genome research* **25**, 995-1007.
- 911 **Merret, R., Martino, L., Bousquet-Antonelli, C., Fneich, S., Descombin, J., Billey,**  
912 **E., Conte, M.R., and Deragon, J.M.** (2013). The association of a La module  
913 with the PABP-interacting motif PAM2 is a recurrent evolutionary process that  
914 led to the neofunctionalization of La-related proteins. *RNA* **19**, 36-50.
- 915 **Muller-McNicoll, M., Botti, V., de Jesus Domingues, A.M., Brandl, H., Schwich,**  
916 **O.D., Steiner, M.C., Curk, T., Poser, I., Zarnack, K., and Neugebauer, K.M.**  
917 (2016). SR proteins are NXF1 adaptors that link alternative RNA processing to  
918 mRNA export. *Genes & development* **30**, 553-566.
- 919 **Nakagawa, T., Suzuki, T., Murata, S., Nakamura, S., Hino, T., Maeo, K., Tabata,**  
920 **R., Kawai, T., Tanaka, K., Niwa, Y., Watanabe, Y., Nakamura, K., Kimura,**  
921 **T., and Ishiguro, S.** (2007). Improved Gateway binary vectors: high-  
922 performance vectors for creation of fusion constructs in transgenic analysis of  
923 plants. *Bioscience, biotechnology, and biochemistry* **71**, 2095-2100.
- 924 **Naro, C., Jolly, A., Di Persio, S., Bielli, P., Setterblad, N., Alberdi, A.J., Vicini, E.,**  
925 **Geremia, R., De la Grange, P., and Sette, C.** (2017). An Orchestrated Intron  
926 Retention Program in Meiosis Controls Timely Usage of Transcripts during  
927 Germ Cell Differentiation. *Developmental cell* **41**, 82-93 e84.
- 928 **Ohtani, M., and Sugiyama, M.** (2005). Involvement of SRD2-mediated activation of  
929 snRNA transcription in the control of cell proliferation competence in  
930 Arabidopsis. *The Plant journal : for cell and molecular biology* **43**, 479-490.
- 931 **Papp, I., Mur, L.A., Dalmadi, A., Dulai, S., and Koncz, C.** (2004). A mutation in the  
932 Cap Binding Protein 20 gene confers drought tolerance to Arabidopsis. *Plant*  
933 *molecular biology* **55**, 679-686.
- 934 **Pimentel, H., Parra, M., Gee, S.L., Mohandas, N., Pachter, L., and Conboy, J.G.**  
935 (2016). A dynamic intron retention program enriched in RNA processing genes  
936 regulates gene expression during terminal erythropoiesis. *Nucleic Acids Res*  
937 **44**, 838-851.
- 938 **Prigge, M.J., and Wagner, D.R.** (2001). The arabidopsis serrate gene encodes a  
939 zinc-finger protein required for normal shoot development. *Plant Cell* **13**, 1263-  
940 1279.
- 941 **Puig, O., Bragado-Nilsson, E., Koski, T., and Seraphin, B.** (2007). The U1  
942 snRNP-associated factor Luc7p affects 5' splice site selection in yeast and  
943 human. *Nucleic Acids Res* **35**, 5874-5885.
- 944 **Raczynska, K.D., Simpson, C.G., Ciesiolka, A., Szewc, L., Lewandowska, D.,**  
945 **McNicol, J., Szweykowska-Kulinska, Z., Brown, J.W., and Jarmolowski,**  
946 **A.** (2010). Involvement of the nuclear cap-binding protein complex in  
947 alternative splicing in Arabidopsis thaliana. *Nucleic Acids Res* **38**, 265-278.
- 948 **Raczynska, K.D., Stepień, A., Kierzkowski, D., Kalak, M., Bajczyk, M., McNicol,**  
949 **J., Simpson, C.G., Szweykowska-Kulinska, Z., Brown, J.W., and**  
950 **Jarmolowski, A.** (2013). The SERRATE protein is involved in alternative  
951 splicing in Arabidopsis thaliana. *Nucleic Acids Res.*

- 952 **Reddy, A.S., Marquez, Y., Kalyna, M., and Barta, A.** (2013). Complexity of the  
953 alternative splicing landscape in plants. *Plant Cell* **25**, 3657-3683.
- 954 **Rigo, F., and Martinson, H.G.** (2008). Functional coupling of last-intron splicing and  
955 3'-end processing to transcription in vitro: the poly(A) signal couples to splicing  
956 before committing to cleavage. *Molecular and cellular biology* **28**, 849-862.
- 957 **Rosel, T.D., Hung, L.H., Medenbach, J., Donde, K., Starke, S., Benes, V., Ratsch,**  
958 **G., and Bindereif, A.** (2011). RNA-Seq analysis in mutant zebrafish reveals  
959 role of U1C protein in alternative splicing regulation. *The EMBO journal* **30**,  
960 1965-1976.
- 961 **Rowley, M.J., Bohmdorfer, G., and Wierzbicki, A.T.** (2013). Analysis of long non-  
962 coding RNAs produced by a specialized RNA polymerase in *Arabidopsis*  
963 *thaliana*. *Methods* **63**, 160-169.
- 964 **Roy, D., Bhanja Chowdhury, J., and Ghosh, S.** (2013). Polypyrimidine tract binding  
965 protein (PTB) associates with intronic and exonic domains to squelch nuclear  
966 export of unspliced RNA. *FEBS letters* **587**, 3802-3807.
- 967 **Schlaen, R.G., Mancini, E., Sanchez, S.E., Perez-Santangelo, S., Rugnone, M.L.,**  
968 **Simpson, C.G., Brown, J.W., Zhang, X., Chernomoretz, A., and Yanovsky,**  
969 **M.J.** (2015). The spliceosome assembly factor GEMIN2 attenuates the effects  
970 of temperature on alternative splicing and circadian rhythms. *Proc Natl Acad*  
971 *Sci U S A* **112**, 9382-9387.
- 972 **Schwab, R., Speth, C., Laubinger, S., and Voinnet, O.** (2013). Enhanced  
973 microRNA accumulation through stemloop-adjacent introns. *EMBO reports* **14**,  
974 615-621.
- 975 **Shao, W., Kim, H.S., Cao, Y., Xu, Y.Z., and Query, C.C.** (2012). A U1-U2 snRNP  
976 interaction network during intron definition. *Molecular and cellular biology* **32**,  
977 470-478.
- 978 **Shaul, O.** (2015). Unique Aspects of Plant Nonsense-Mediated mRNA Decay.  
979 *Trends Plant Sci* **20**, 767-779.
- 980 **Shen, S., Park, J.W., Lu, Z.X., Lin, L., Henry, M.D., Wu, Y.N., Zhou, Q., and Xing,**  
981 **Y.** (2014). rMATS: robust and flexible detection of differential alternative  
982 splicing from replicate RNA-Seq data. *Proc Natl Acad Sci U S A* **111**, E5593-  
983 5601.
- 984 **Staiger, D., and Brown, J.W.** (2013). Alternative splicing at the intersection of  
985 biological timing, development, and stress responses. *Plant Cell* **25**, 3640-  
986 3656.
- 987 **Stepien, A., Knop, K., Dolata, J., Taube, M., Bajczyk, M., Barciszewska-Pacak,**  
988 **M., Pacak, A., Jarmolowski, A., and Szwejkowska-Kulinska, Z.** (2017).  
989 Posttranscriptional coordination of splicing and miRNA biogenesis in plants.  
990 *Wiley Interdiscip Rev RNA* **8**.
- 991 **Sullivan, C., and Howard, P.L.** (2016). The Diverse Requirements of ARS2 in  
992 nuclear cap-binding complex-dependent RNA Processing. *Rna & Disease*.
- 993 **Sun, M., Lariviere, L., Dengl, S., Mayer, A., and Cramer, P.** (2010). A tandem SH2  
994 domain in transcription elongation factor Spt6 binds the phosphorylated RNA  
995 polymerase II C-terminal repeat domain (CTD). *The Journal of biological*  
996 *chemistry* **285**, 41597-41603.
- 997 **Umezawa, T., Sugiyama, N., Takahashi, F., Anderson, J.C., Ishihama, Y., Peck,**  
998 **S.C., and Shinozaki, K.** (2013). Genetics and phosphoproteomics reveal a  
999 protein phosphorylation network in the abscisic acid signaling pathway in  
1000 *Arabidopsis thaliana*. *Sci Signal* **6**, rs8.
- 1001 **Wachter, A., Tunc-Ozdemir, M., Grove, B.C., Green, P.J., Shintani, D.K., and**  
1002 **Breaker, R.R.** (2007). Riboswitch control of gene expression in plants by

- 1003 splicing and alternative 3' end processing of mRNAs. *The Plant cell* **19**, 3437-  
1004 3450.
- 1005 **Wahl, M.C., Will, C.L., and Luhrmann, R.** (2009). The spliceosome: design  
1006 principles of a dynamic RNP machine. *Cell* **136**, 701-718.
- 1007 **Wang, B.B., and Brendel, V.** (2004). The ASRG database: identification and survey  
1008 of *Arabidopsis thaliana* genes involved in pre-mRNA splicing. *Genome biology*  
1009 **5**, R102.
- 1010 **Wang, C., Tian, Q., Hou, Z., Mucha, M., Aukerman, M., and Olsen, O.A.** (2007).  
1011 The *Arabidopsis thaliana* AT PRP39-1 gene, encoding a tetratricopeptide  
1012 repeat protein with similarity to the yeast pre-mRNA processing protein  
1013 PRP39, affects flowering time. *Plant cell reports* **26**, 1357-1366.
- 1014 **Wang, P., Xue, L., Batelli, G., Lee, S., Hou, Y.J., Van Oosten, M.J., Zhang, H.,  
1015 Tao, W.A., and Zhu, J.K.** (2013). Quantitative phosphoproteomics identifies  
1016 SnRK2 protein kinase substrates and reveals the effectors of abscisic acid  
1017 action. *Proc Natl Acad Sci U S A* **110**, 11205-11210.
- 1018 **Webby, C.J., Wolf, A., Gromak, N., Dreger, M., Kramer, H., Kessler, B., Nielsen,  
1019 M.L., Schmitz, C., Butler, D.S., Yates, J.R., 3rd, Delahunty, C.M., Hahn, P.,  
1020 Lengeling, A., Mann, M., Proudfoot, N.J., Schofield, C.J., and Bottger, A.**  
1021 (2009). Jmjd6 catalyses lysyl-hydroxylation of U2AF65, a protein associated  
1022 with RNA splicing. *Science* **325**, 90-93.
- 1023 **Will, C.L., and Luhrmann, R.** (2001). Spliceosomal UsnRNP biogenesis, structure  
1024 and function. *Current opinion in cell biology* **13**, 290-301.
- 1025 **Will, C.L., and Luhrmann, R.** (2011). Spliceosome structure and function. *Cold  
1026 Spring Harbor perspectives in biology* **3**.
- 1027 **Wong, J.J., Au, A.Y., Ritchie, W., and Rasko, J.E.** (2016). Intron retention in  
1028 mRNA: No longer nonsense: Known and putative roles of intron retention in  
1029 normal and disease biology. *BioEssays : news and reviews in molecular,  
1030 cellular and developmental biology* **38**, 41-49.
- 1031 **Workman, E., Veith, A., and Battle, D.J.** (2014). U1A regulates 3' processing of the  
1032 survival motor neuron mRNA. *The Journal of biological chemistry* **289**, 3703-  
1033 3712.
- 1034 **Xing, D., Wang, Y., Hamilton, M., Ben-Hur, A., and Reddy, A.S.** (2015).  
1035 Transcriptome-Wide Identification of RNA Targets of *Arabidopsis*  
1036 SERINE/ARGININE-RICH45 Uncovers the Unexpected Roles of This RNA  
1037 Binding Protein in RNA Processing. *Plant Cell*.
- 1038 **Yap, K., Lim, Z.Q., Khandelia, P., Friedman, B., and Makeyev, E.V.** (2012).  
1039 Coordinated regulation of neuronal mRNA steady-state levels through  
1040 developmentally controlled intron retention. *Genes Dev* **26**, 1209-1223.
- 1041 **Yoine, M., Ohto, M.A., Onai, K., Mita, S., and Nakamura, K.** (2006). The lba1  
1042 mutation of UPF1 RNA helicase involved in nonsense-mediated mRNA decay  
1043 causes pleiotropic phenotypic changes and altered sugar signalling in  
1044 *Arabidopsis*. *The Plant journal : for cell and molecular biology* **47**, 49-62.
- 1045 **Zhan, X., Qian, B., Cao, F., Wu, W., Yang, L., Guan, Q., Gu, X., Wang, P.,  
1046 Okusolubo, T.A., Dunn, S.L., Zhu, J.K., and Zhu, J.** (2015). An *Arabidopsis*  
1047 PWI and RRM motif-containing protein is critical for pre-mRNA splicing and  
1048 ABA responses. *Nature communications* **6**, 8139.
- 1049
